# Supplementary material for: Integrated molecular analysis of clear-cell renal cell carcinoma
Source: Springer Nature journal article supplement (doi:10.1038/ng.2699), 2013-06-24
Supplement: 41588_2013_BFng2699_MOESM34_ESM.pdf [file 41588_2013_BFng2699_MOESM34_ESM.pdf]

## **Supplementary Information**

### **Integrated molecular analysis of clear cell renal cell carcinoma**

Yusuke Sato, Tetsuichi Yoshizato, Yuichi Shiraishi, Shigekatsu Maekawa, Yusuke Okuno, Takumi Kamura, Teppei Shimamura, Aiko Sato-Otsubo, Genta Nagae, Hiromichi Suzuki, Yasunobu Nagata, Yasunobu Nagata, Kenichi Yoshida, Ayana Kon, Yutaka Suzuki, Kenich Chiba, Hiroko Tanaka, Atsushi Niida, Akihiro Fujimoto, Tatsuhiko Tsunoda, Teppei Morikawa, Daichi Maeda, Haruki Kume, Sumio Sugano, Masashi Fukayama, Hiroyuki Aburatani, Masashi Sanada, Satoru Miyano, Yukio Homma and Seishi Ogawa

**Table of contents:**

**1. Supplementary Figures**

**Figure 1.** Mean coverage by whole-genome sequencing for paired tumor (T)/normal (N) DNA from 14 ccRCC cases..... **p.3**

**Figure 2.** Somatic mutations detected by whole-genome sequencing for 14 ccRCC specimens..... **p.4**

**Figure 3.** Circos plots of 14 ccRCC genomes..... **p.5**

**Figure 4.** Mean coverage by whole-exome sequencing for paired tumor (T)/normal (N) DNA from 106 ccRCC cases..... **p.6**

**Figure 5.** Diagonal plots of validated coding sequence mutations detected by whole-genome and/or exome sequencing for 14 ccRCC specimens analyzed with both platforms..... **p.7**

**Figure 6.** Lower allele frequencies of somatic mutations detected only by whole-exome sequencing..... **p.8**

**Figure 7.** Intratumoral heterogeneity in ccRCC cases..... **p.8**

**Figure 8.** LOH mapping in the 3p arm in ccRCC..... **p.9**

**Figure 9.** Mutation distributions in 3p targets, including *VHL*, *PBRM1*, *SETD2* and *BAP1*..... **p.9**

**Figure 10.** Amino-acid sequence alignments for Elongin C (TCEB1) from different species..... **p.10**

**Figure 11.** Compromised binding of mutant Elongin C (TCEB1) to VHL and other BC-box proteins..... **p.10**

**Figure 12.** HIF1 $\alpha$  expression in IHC..... **p.11**

**Figure 13.** Significantly mutated genes/pathways in 106 exome cases..... **p.12**

**Figure 14.** Histologies of tumors having *KEAP1/NRF2/CUL3* mutations..... **p.13**

**Figure 15.** Copy number profiles of 240 ccRCC specimens..... **p.14**

**Figure 16.** Higher allele frequencies of mutations in the 3p target genes in cases with 3p UPD..... **p.15**

**Figure 17.** *NONO-TFE3* fusion transcript..... **p.16**

**Figure 18.** ccA and ccB clusters identified from the expression profiles of 101 ccRCC samples..... **p.17**

**Figure 19.** Different expression signatures between *BAP1*- and *PBRM1*-mutated tumors..... **p.18**

**Figure 20.** Difference of methylation level among high/intimidate/low methylation clusters..... **p.18**

**Figure 21.** Association between methylation of PRC2 target genes and *BAP1*

mutation/expression and *EZH2* expression. .... p.19

**Figure 22.** Histologies of tumors having no *VHL* or *TCEB1* alterations.....  
p.20

**2. Supplementary Tables**

**Table 1.** Characteristics of the patients..... excel file (**Stable1.xlsx**)

**Table 2.** List of mutations in whole-genome sequencing  
..... excel file (**Stable2.xlsx**)

**Table 3.** List of mutations in exome-sequencing..... excel file (**Stable3.xlsx**)

**Table 4.** Recurrently mutated genes found in whole-exome sequencing  
..... excel file (**Stable4.xlsx**)

**Table 5.** Multivariate analysis of prognosis for 240 ccRCC cases..... p.21

**Table 6.** Clinicopathological characteristics of *VHL*- and *TCEB1*- mutated tumors  
..... p.22

**Table 7.** Knockdown efficacy of siRNA for *TCEB1* mRNA..... p.23

**Table 8.** Results of immunostaining of HIF1 $\alpha$  and HIF2 $\alpha$ ..... p.24

**Table 9.** Significantly enriched mutational pathways..... p.26

**Table 10.** Summary of RNA sequencing data..... excel file (**Stable8.xlsx**)

**Table 11.** Fusion transcripts detected in RNA sequencing  
..... excel file (**Stable9.xlsx**)

**Table 12.** Overrepresented annotation terms among differentially methylated genes  
..... excel file (**Stable10.xlsx**)

**Table 13.** List of PCR primers for frequently mutated genes  
..... excel file (**Stable11.xlsx**)

**Table 14.** List of PCR primers used for deep sequencing  
..... excel file (**Stable12.xlsx**)

**Table 15.** List of antibodies for immunoblot analysis..... p.27

**3. Supplementary Note..... p.28**

## Supplementary Figure 1

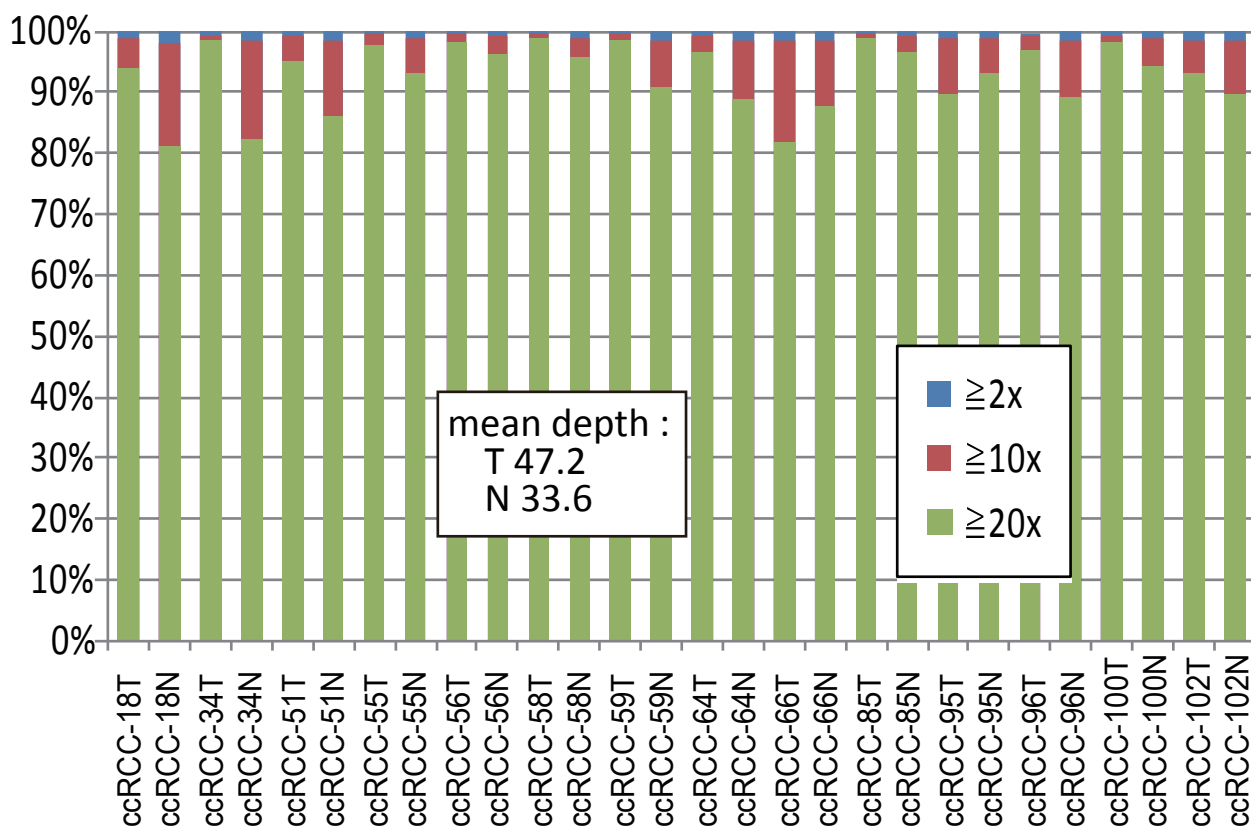

**Mean coverage by whole-genome sequencing for paired tumor (T)/normal (N) DNA from 14 ccRCC cases.**

Genomic fractions analyzed by the indicated coverage are shown by colors.

## Supplementary Figure 2

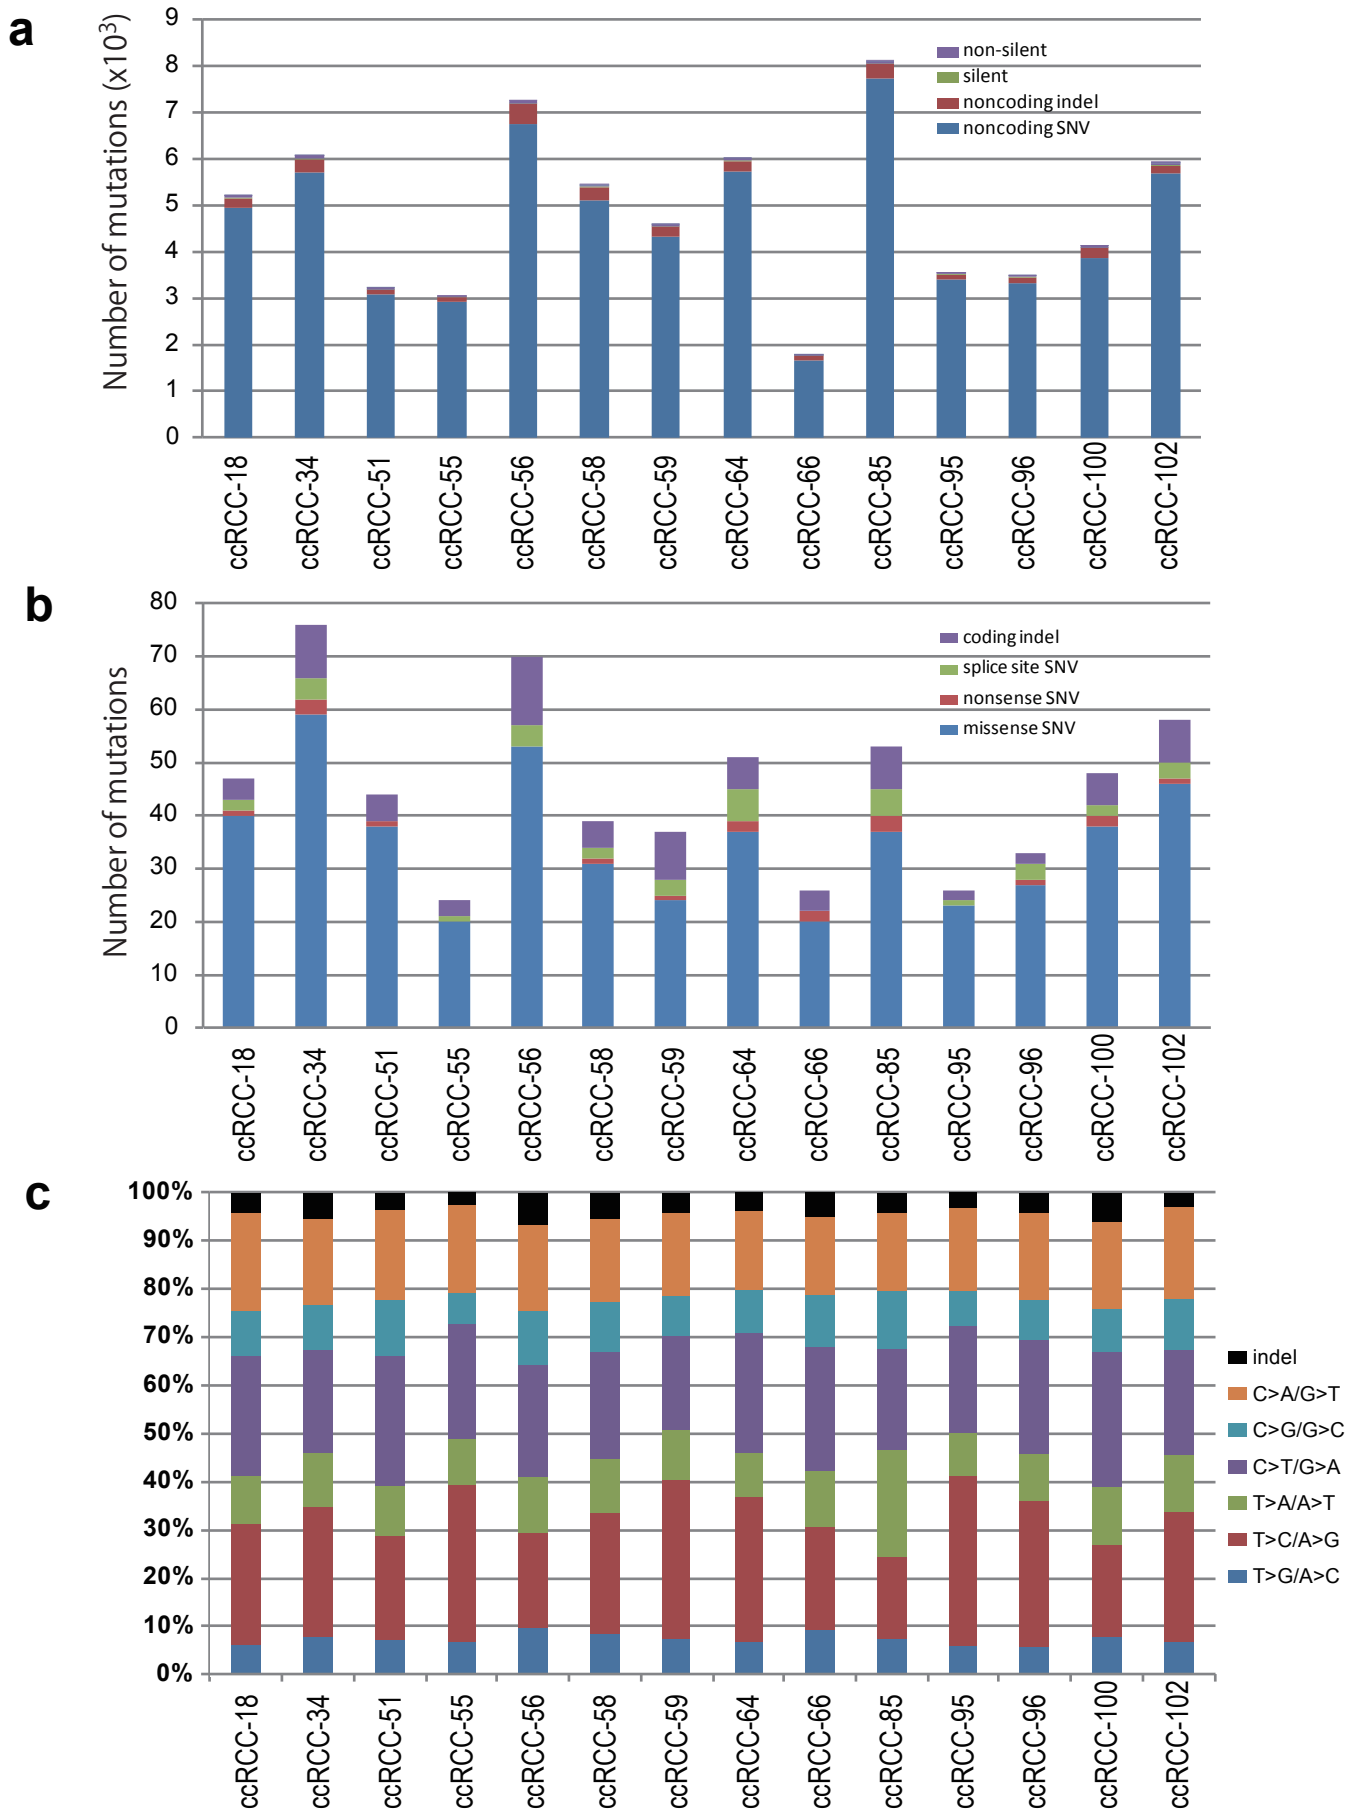

**Somatic mutations detected by whole-genome sequencing for 14 ccRCC specimens**  
**(a)** Total number of mutations within coding and non-coding regions. **(b)** Differential counts of non-silent mutations. **(c)** Spectrum of single-nucleotide substitutions.

# Supplementary Figure 3

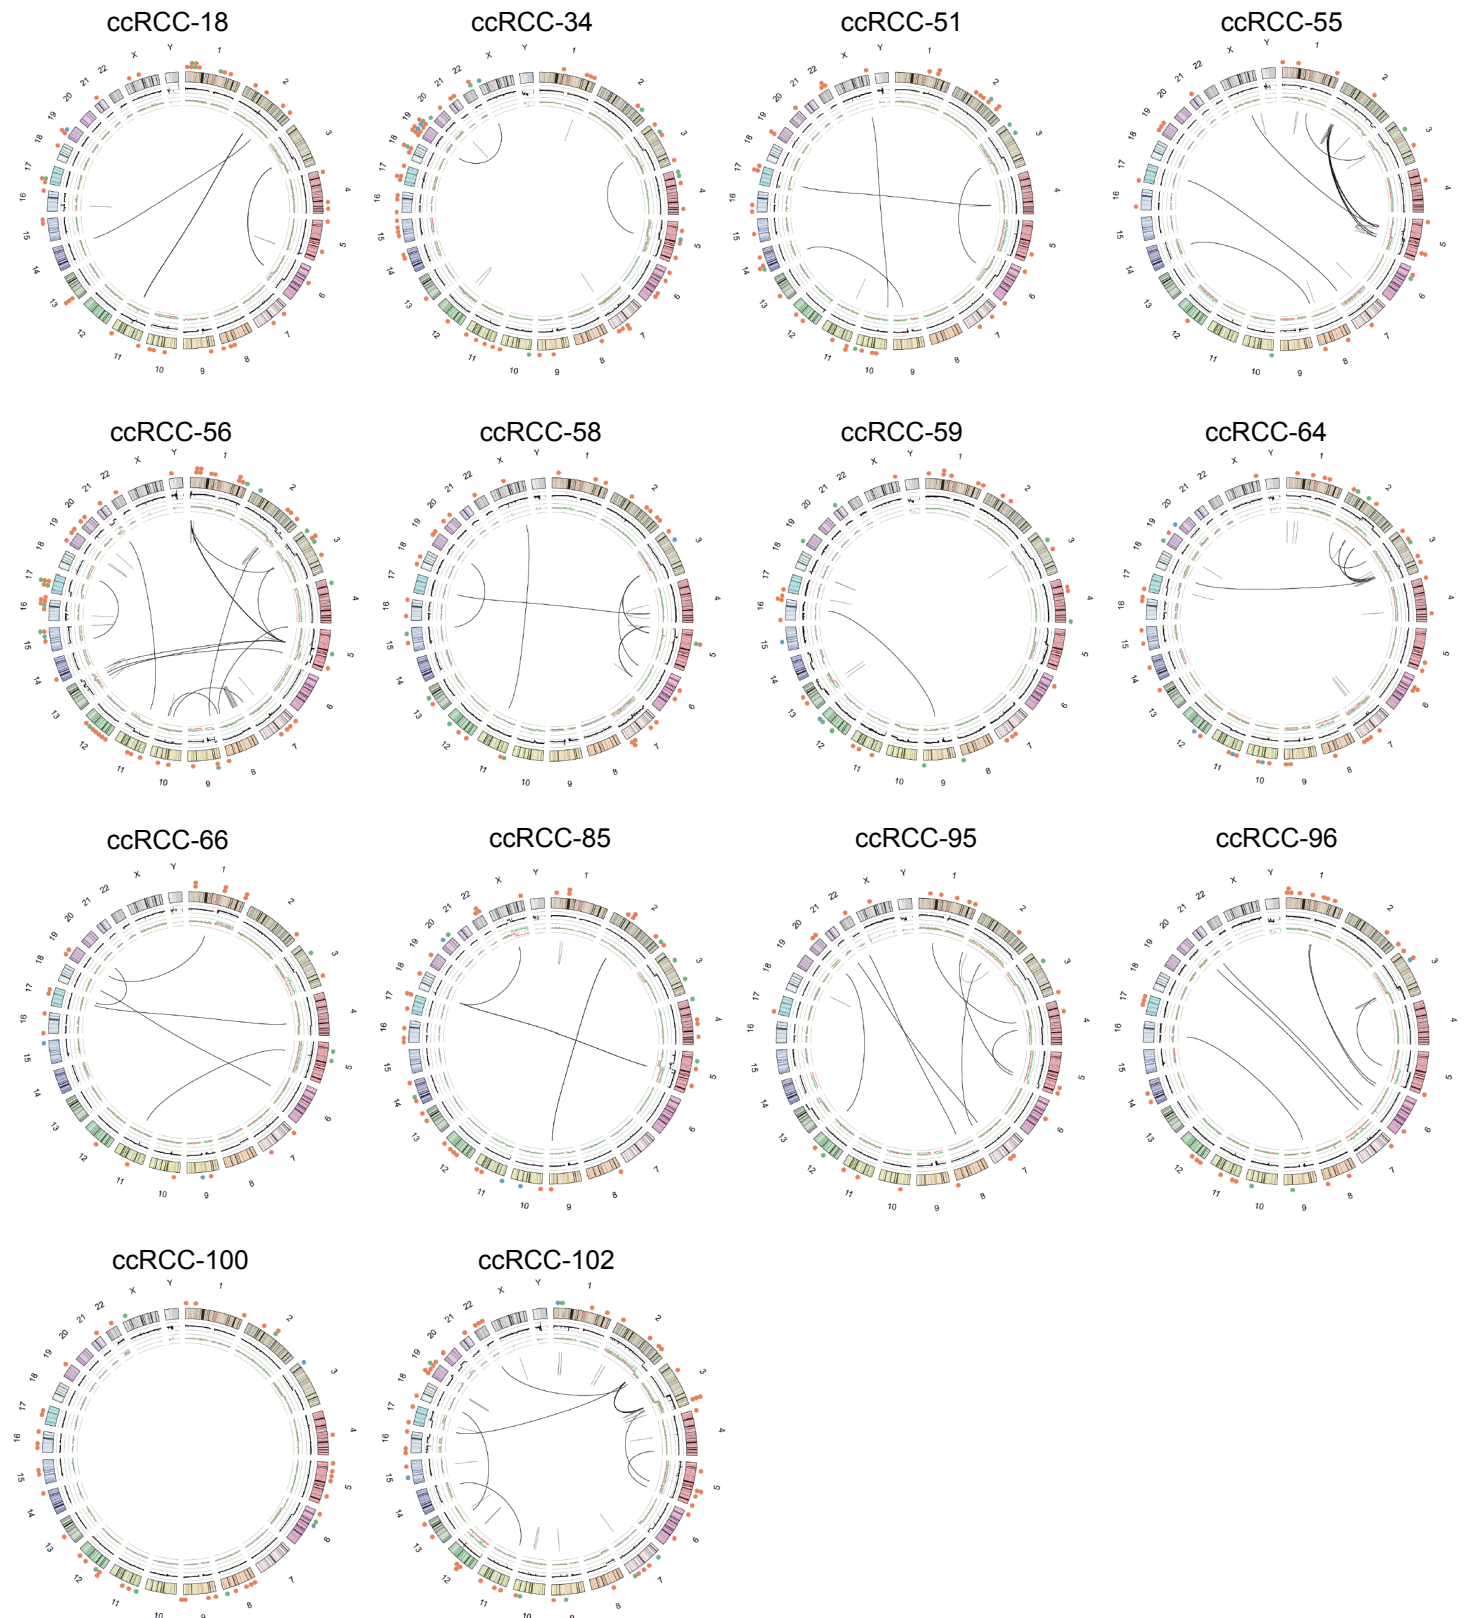

## Circos plots of 14 ccRCC genomes

Locations of non-silent mutations, including missense (orange), nonsense (blue) and frameshift (green) mutations are indicated. Total (black) and allele-specific (red and green) genomic copy numbers and structural variations (transverse lines) are indicated in the inner circles. Sample IDs are shown at the top of each circos.

# Supplementary Figure 4

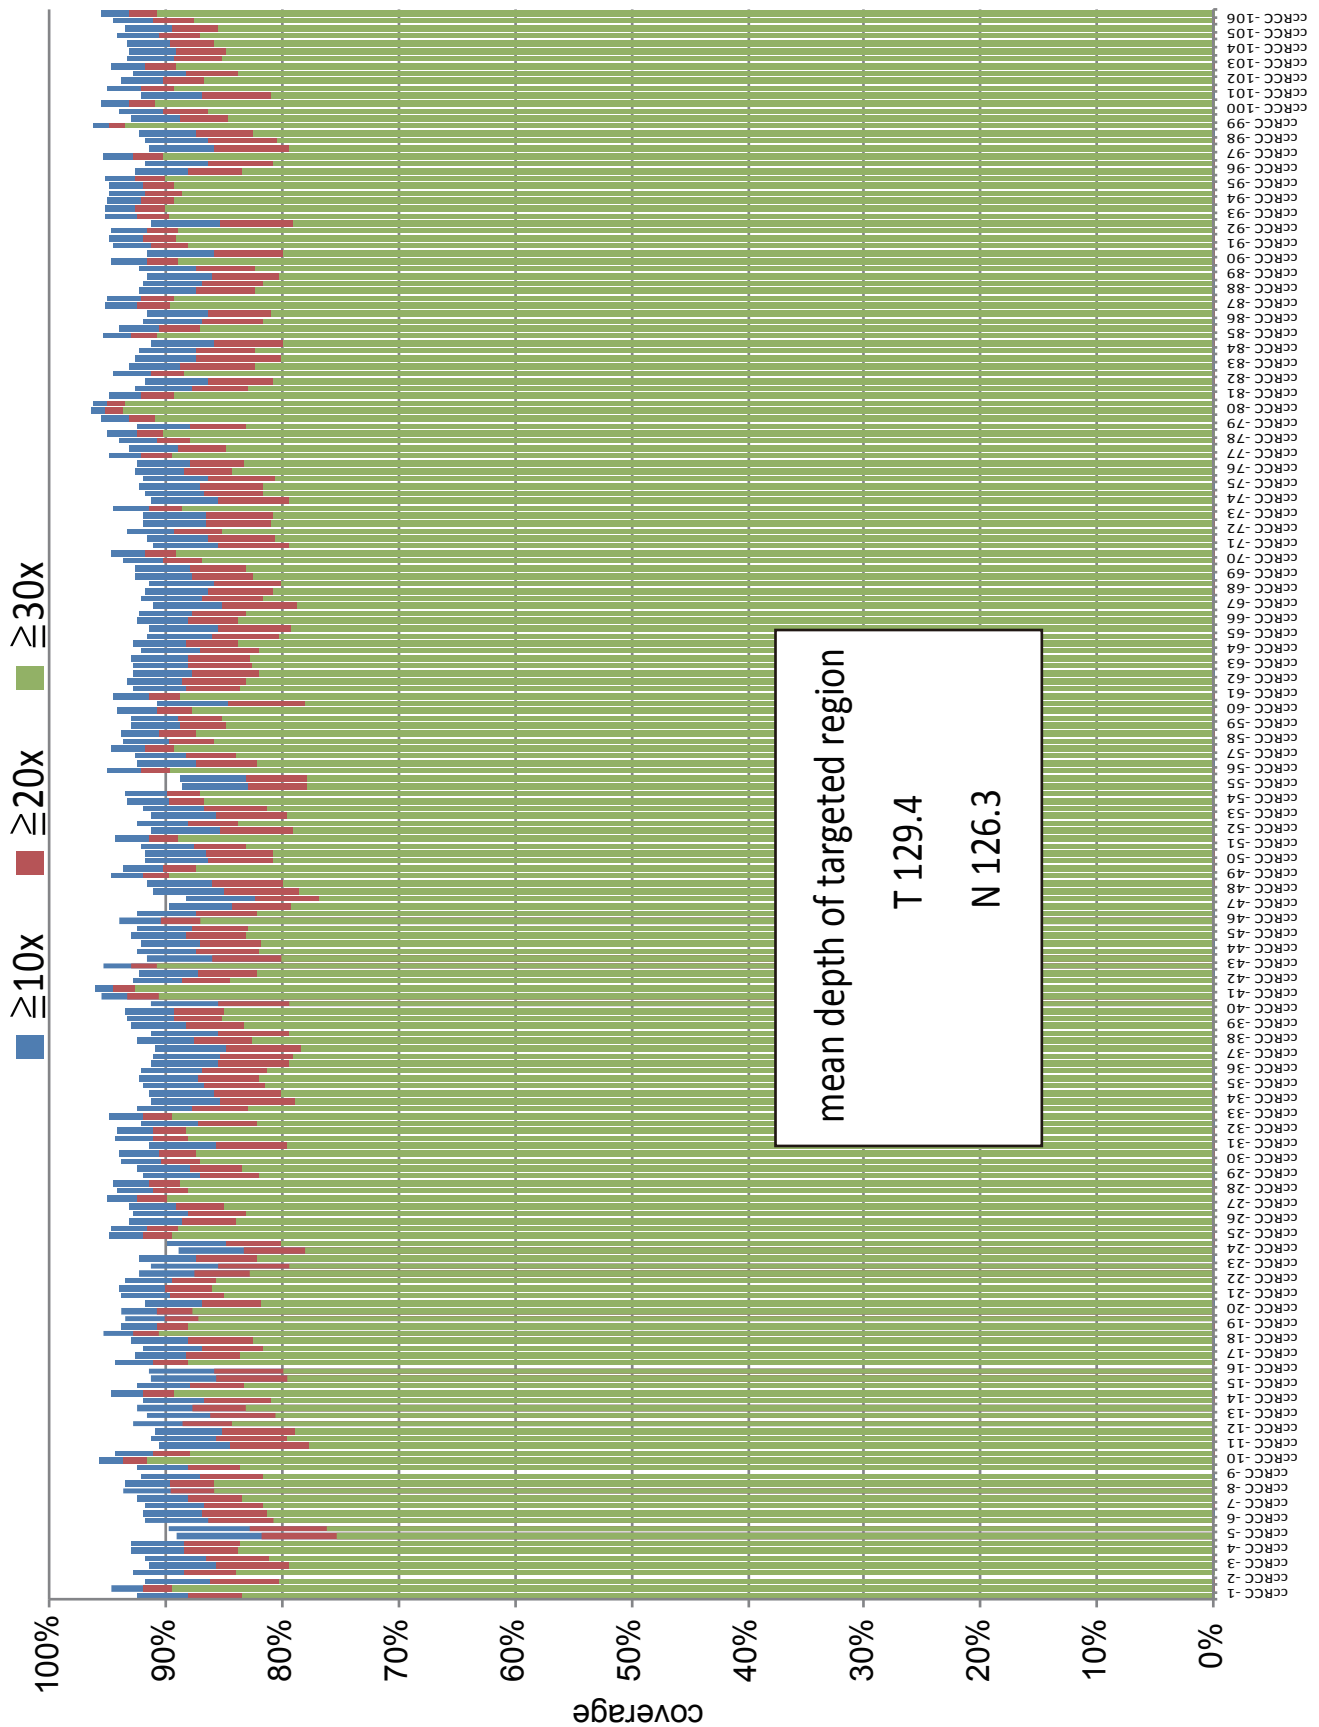

**Mean coverage by whole-exome sequencing for paired tumor (T)/normal (N) DNA from 106 ccRCC cases.**

Fractions of target exome sequences analyzed by the indicated coverage are shown by different colors.

# Supplementary Figure 5

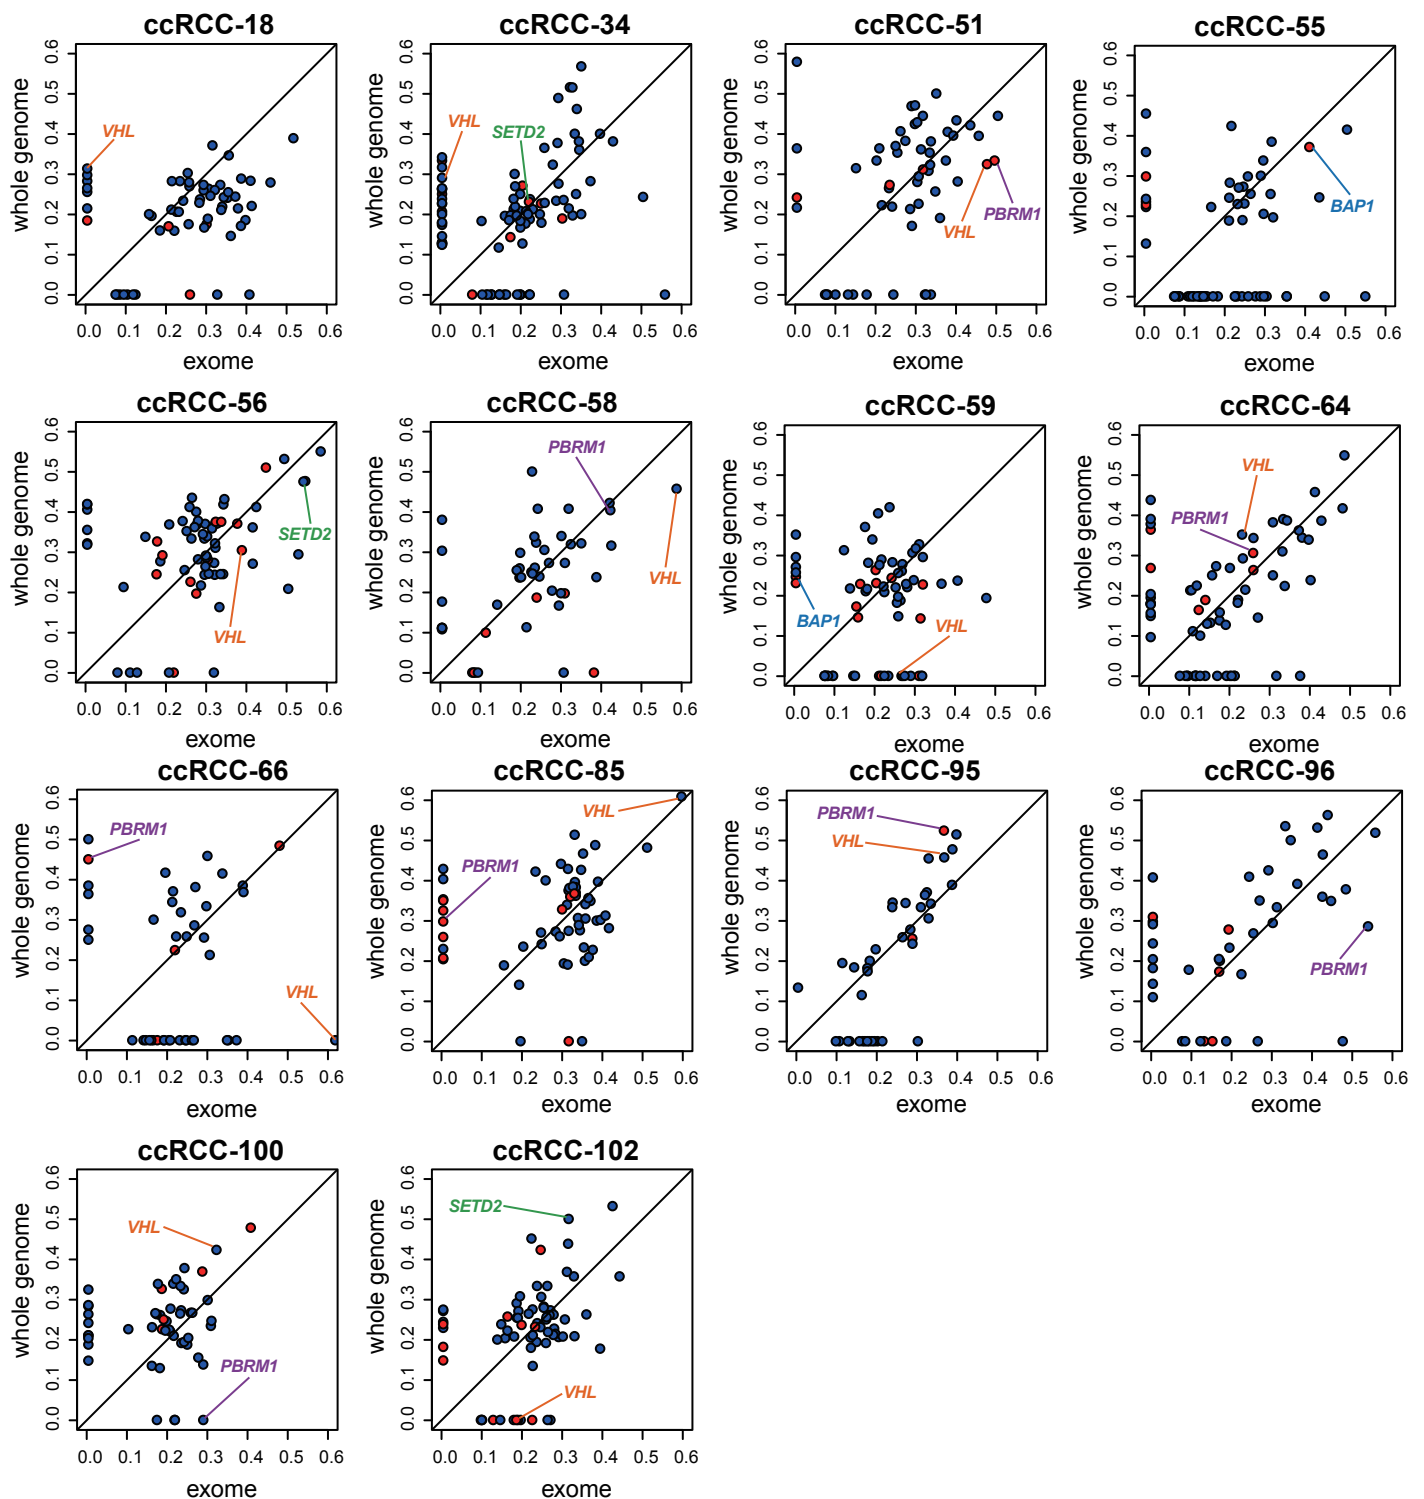

## Diagonal plots of validated coding sequence mutations detected by whole-genome and/or exome sequencing for 14 ccRCC specimens analyzed with both platforms

Observed allele frequencies from both sequencing platforms are plotted for each mutation. Major driver mutations are indicated. SNVs are shown in blue whereas indels are shown in red.



# Supplementary Figure 6

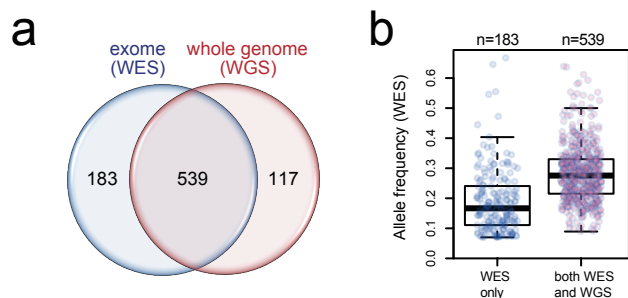

**Lower allele frequencies of somatic mutations detected only by whole-exome sequencing for 14 ccRCC specimens**

**(a)** Number of confirmed somatic mutations detected by whole-genome and/or exome sequencing.

**(b)** Comparisons of allele frequencies between validated somatic mutations detected by whole-exome sequencing only and by both whole-genome and exome sequencing.

# Supplementary Figure 7

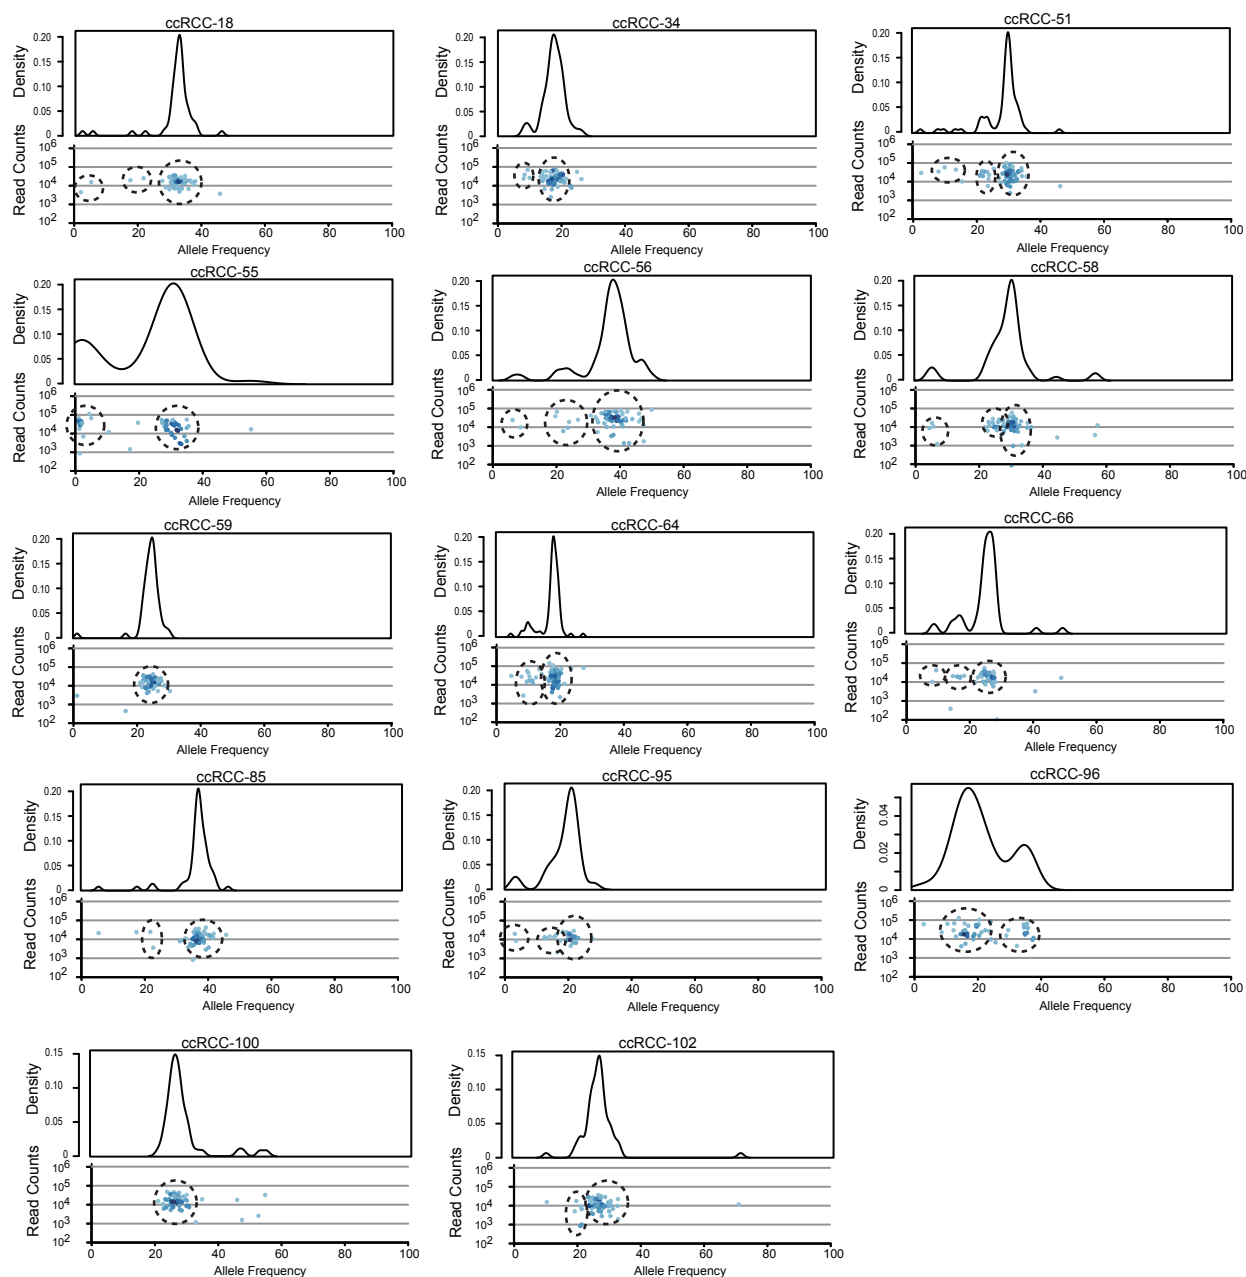

## Intratumoral heterogeneity in ccRCC cases

Kernel density estimations of clonal populations based on allele frequencies of observed somatic mutations using deep sequencing (top panels). The frequency of each variant allele is plotted against the total number of sequencing reads that covered the corresponding nucleotide positions (bottom panels).

## Supplementary Figure 8

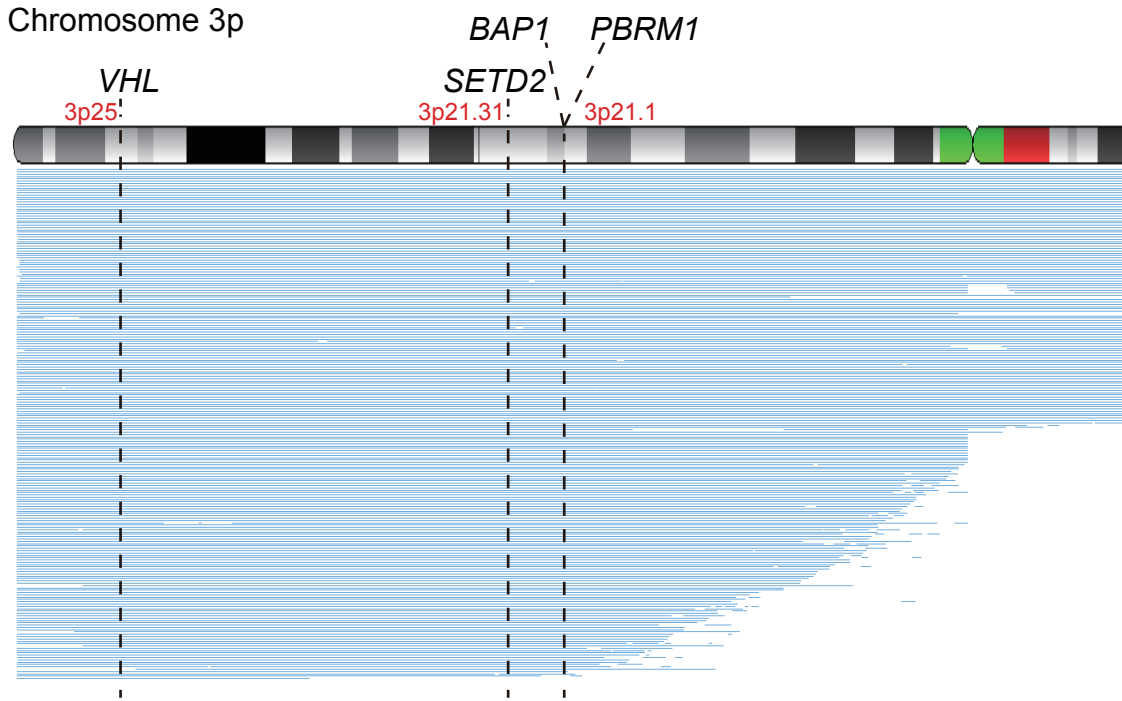

### LOH mapping in the 3p arm in ccRCC

LOH in the 3p arm found in a total of 226 ccRCC cases by SNP array analysis. The genetic loci of the 4 major targets of 3p LOH are indicated in which the *PBRM1* locus demarcates the common LOH regions.

## Supplementary Figure 9

● missense ● nonsense/frameshift indel ● inframe indel ● splice site

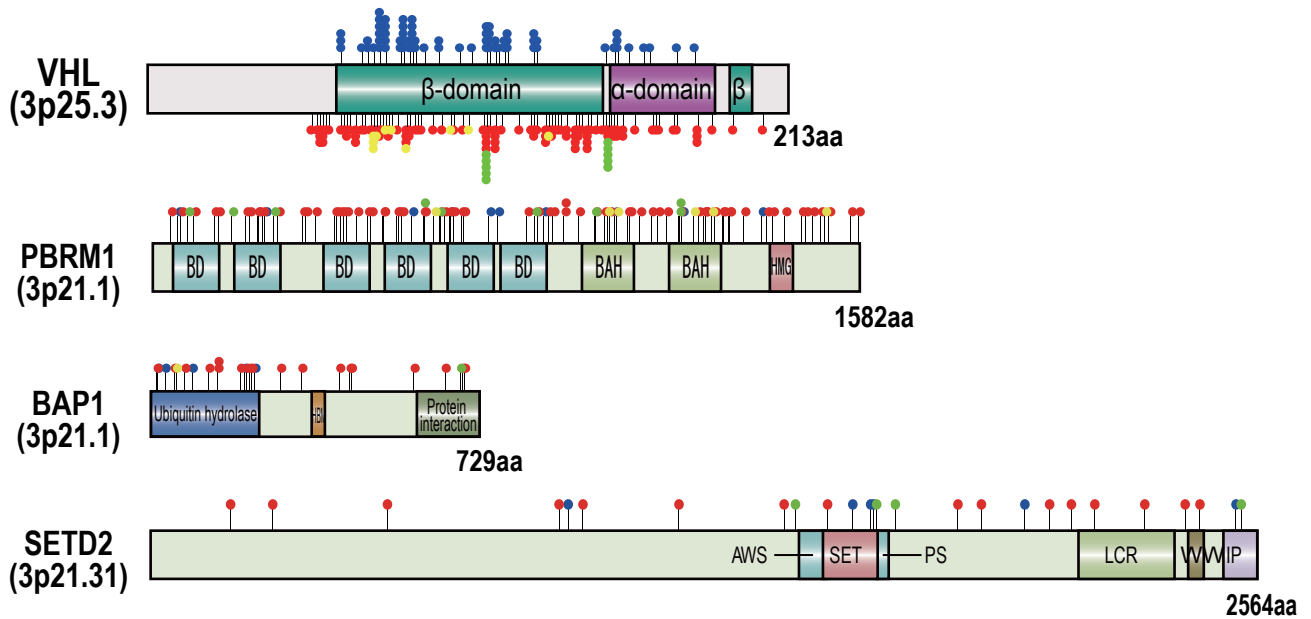

### Mutation distributions in 3p targets, including *VHL*, *PBRM1*, *SETD2* and *BAP1*

Mutations of *VHL*, *PBRM1*, *SETD2* and *BAP1* in a cohort of 240 ccRCC cases. Types of mutations are distinguished by the indicated colors.

# Supplementary Figure 10

## Elongin C (TCEB1)

|                               |                |   |                                                  |    |
|-------------------------------|----------------|---|--------------------------------------------------|----|
| [Homo sapiens]                | NP_001191786.1 | 1 | -----MDGEEKTYGGCEGPDAMVVKLISSDGHEFIVKREHALT      | 38 |
| [Pan troglodytes]             | XP_001154170.1 | 1 | -----MDGEEKTYGGCEGPDAMVVKLISSDGHEFIVKREHALT      | 38 |
| [Pan troglodytes]             | XP_003311809.1 | 1 | -----MDGEEKTYGGCEGPDAMVVKLISSDGHEFIVKREHALT      | 38 |
| [Macaca mulatta]              | XP_002805434.1 | 1 | -----MDGEEKTYGGCEGPDAMVVKLISSDGHEFIVKREHALT      | 38 |
| [Canis lupus familiaris]      | XP_535104.1    | 1 | -----MDGEEKTYGGCEGPDAMVVKLISSDGHEFIVKREHALT      | 38 |
| [Bos taurus]                  | NP_001039958.1 | 1 | -----MDGEEKTYGGCEGPDAMVVKLISSDGHEFIVKREHALT      | 38 |
| [Mus musculus]                | NP_080732.1    | 1 | -----MDGEEKTYGGCEGPDAMVVKLISSDGHEFIVKREHALT      | 38 |
| [Rattus norvegicus]           | NP_072115.1    | 1 | -----MDGEEKTYGGCEGPDAMVVKLISSDGHEFIVKREHALT      | 38 |
| [Gallus gallus]               | NP_001007889.1 | 1 | -----MDGEEKTYGGCEGPDAMVVKLISSDGHEFIVKREHALT      | 38 |
| [Danio rerio]                 | NP_001002440.2 | 1 | -----MDSEKTYGGCEGPDAMVVKLISSDGHEFIVKREHALT       | 38 |
| [Drosophila melanogaster]     | NP_725894.1    | 1 | -----MIAMDEQRGDKIYGGCEGPDAMVVKLISSDGHEFVVKREHALT | 43 |
| [Anopheles gambiae str. PEST] | XP_309973.2    | 1 | -----NNMEERTGTERIYGGCEGPDAMVVKLISSDGHEFIVKREHALT | 43 |
| [Caenorhabditis elegans]      | NP_497405.1    | 1 | MADQNNAIQCDQDAQFKQYGGIEGPTSQVVKLVSSDDHEFIKREHALT | 50 |

  

|  |  |      |  |       |  |
|--|--|------|--|-------|--|
|  |  | Y79S |  | A100P |  |
|  |  | Y79C |  |       |  |

  

|    |                                                                               |     |
|----|-------------------------------------------------------------------------------|-----|
| 39 | SGTIKAMLSGPGQFAENETNEVNFREIPSHVLSKVCMYFTYKRVYTNSSSTEIPEFFPIAPEIALELLMAANFLDC  | 112 |
| 44 | SGTIRAMLSGPGQFAENEANEVHNFREIPSHVLQKVCMYFTYKRVYTNSSSTEIPEFFPIAPEIALELLMAANFLDC | 117 |
| 44 | SGTIKAMLSGPGQFAENETNEVNFREIPSHVLSKVCMYFTYKRVYTNSSSTEIPEFFPIAPEIALELLMAANFLDC  | 117 |
| 51 | SGTIRAMLSGPGQFAENESNVVYFREIPSHVLQKVCQYFAYKRVYTHAATEIPEFFPIPEIDVALELLMAANFLDC  | 124 |

## Amino-acid sequence alignments for Elongin C (TCEB1) from different species

Completely conserved amino acids among all species are indicated in blue; mutational hot spots are shown in red.

# Supplementary Figure 11

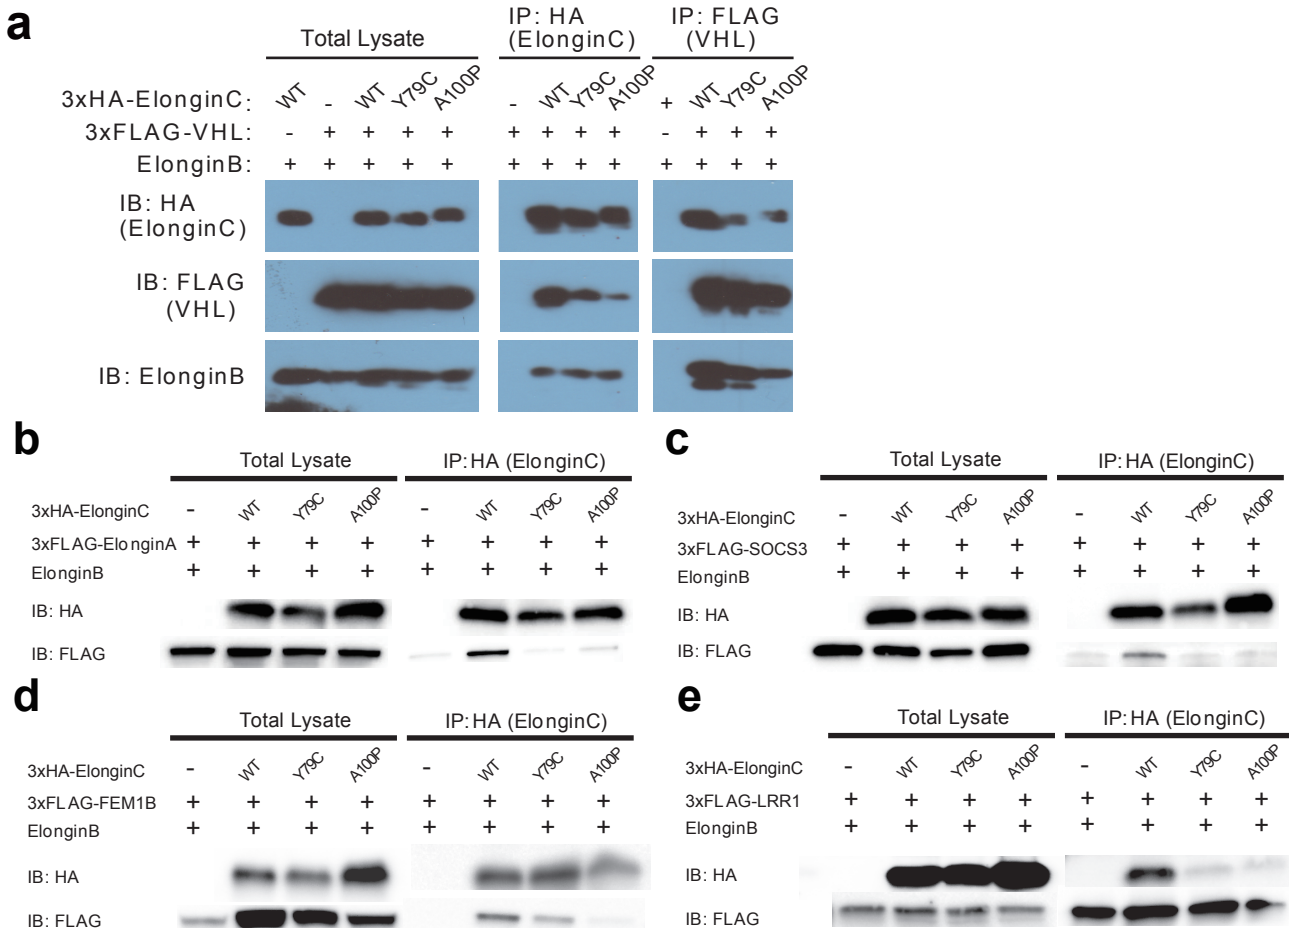

## Compromised binding of mutant Elongin C (TCEB1) to VHL and other BC-box proteins

(a) Western blotting for indicated components of the VHL complex in total cell lysates (left panels), and precipitated with anti-HA (Elongin C) (middle panels) and anti-FLAG (VHL) in lysates from 293T cells transduced with the indicated mock, wild-type or mutant 3xHA-tagged Elongin C, Elongin B and 3xFLAG-tagged VHL. (b-e) Western blot analyses of BC-box proteins in total cell lysates (left panels) and precipitated with anti-HA (Elongin C) or anti-FLAG (BC-box protein) (right panels) in lysates from 293T cells transduced with either mock, wild-type, mutant 3xHA-tagged Elongin C, Elongin B and 3xFLAG-tagged Elongin A (b), SOCS3 (c), FEM1B (d) and LRR1 (e).

## Supplementary Figure 12

**a**

*TCEB1* mutation(+)

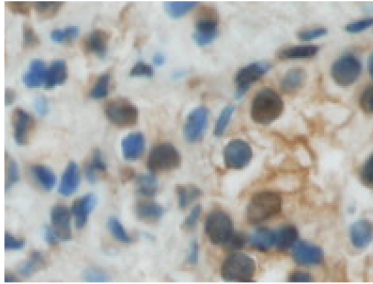

ccRCC-35

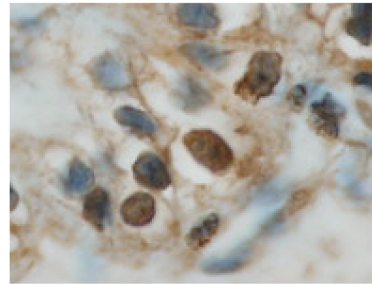

ccRCC-42

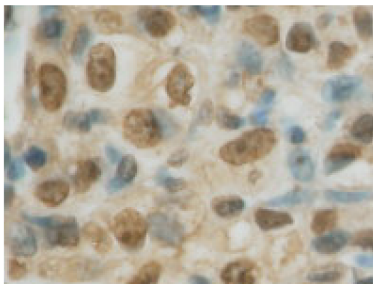

ccRCC-48

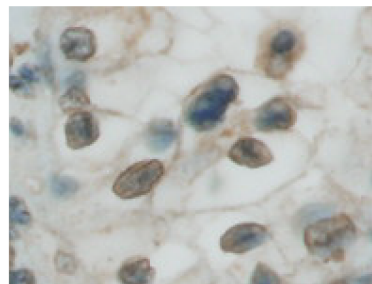

ccRCC-54

**b**

*VHL* methylation(+)

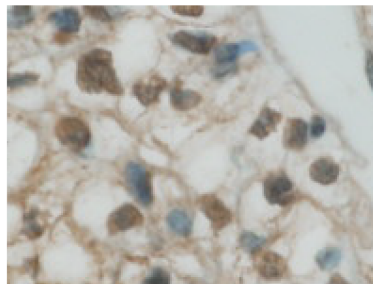

ccRCC-17

**c**

*VHL/TCEB1* mutation(-)

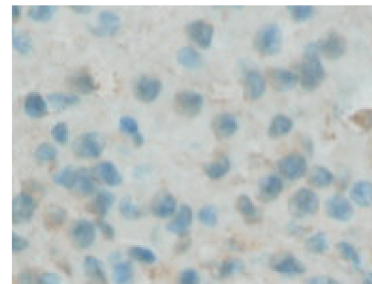

ccRCC-2

### HIF1 $\alpha$ expression in IHC

Increased HIF expression was confirmed in *TCEB1* mutated tumors (**a**) as well as a tumor with *VHL* promoter methylation (**b**), but not in a tumor without *VHL/TCEB1* alterations (**c**).

# Supplementary Figure 13

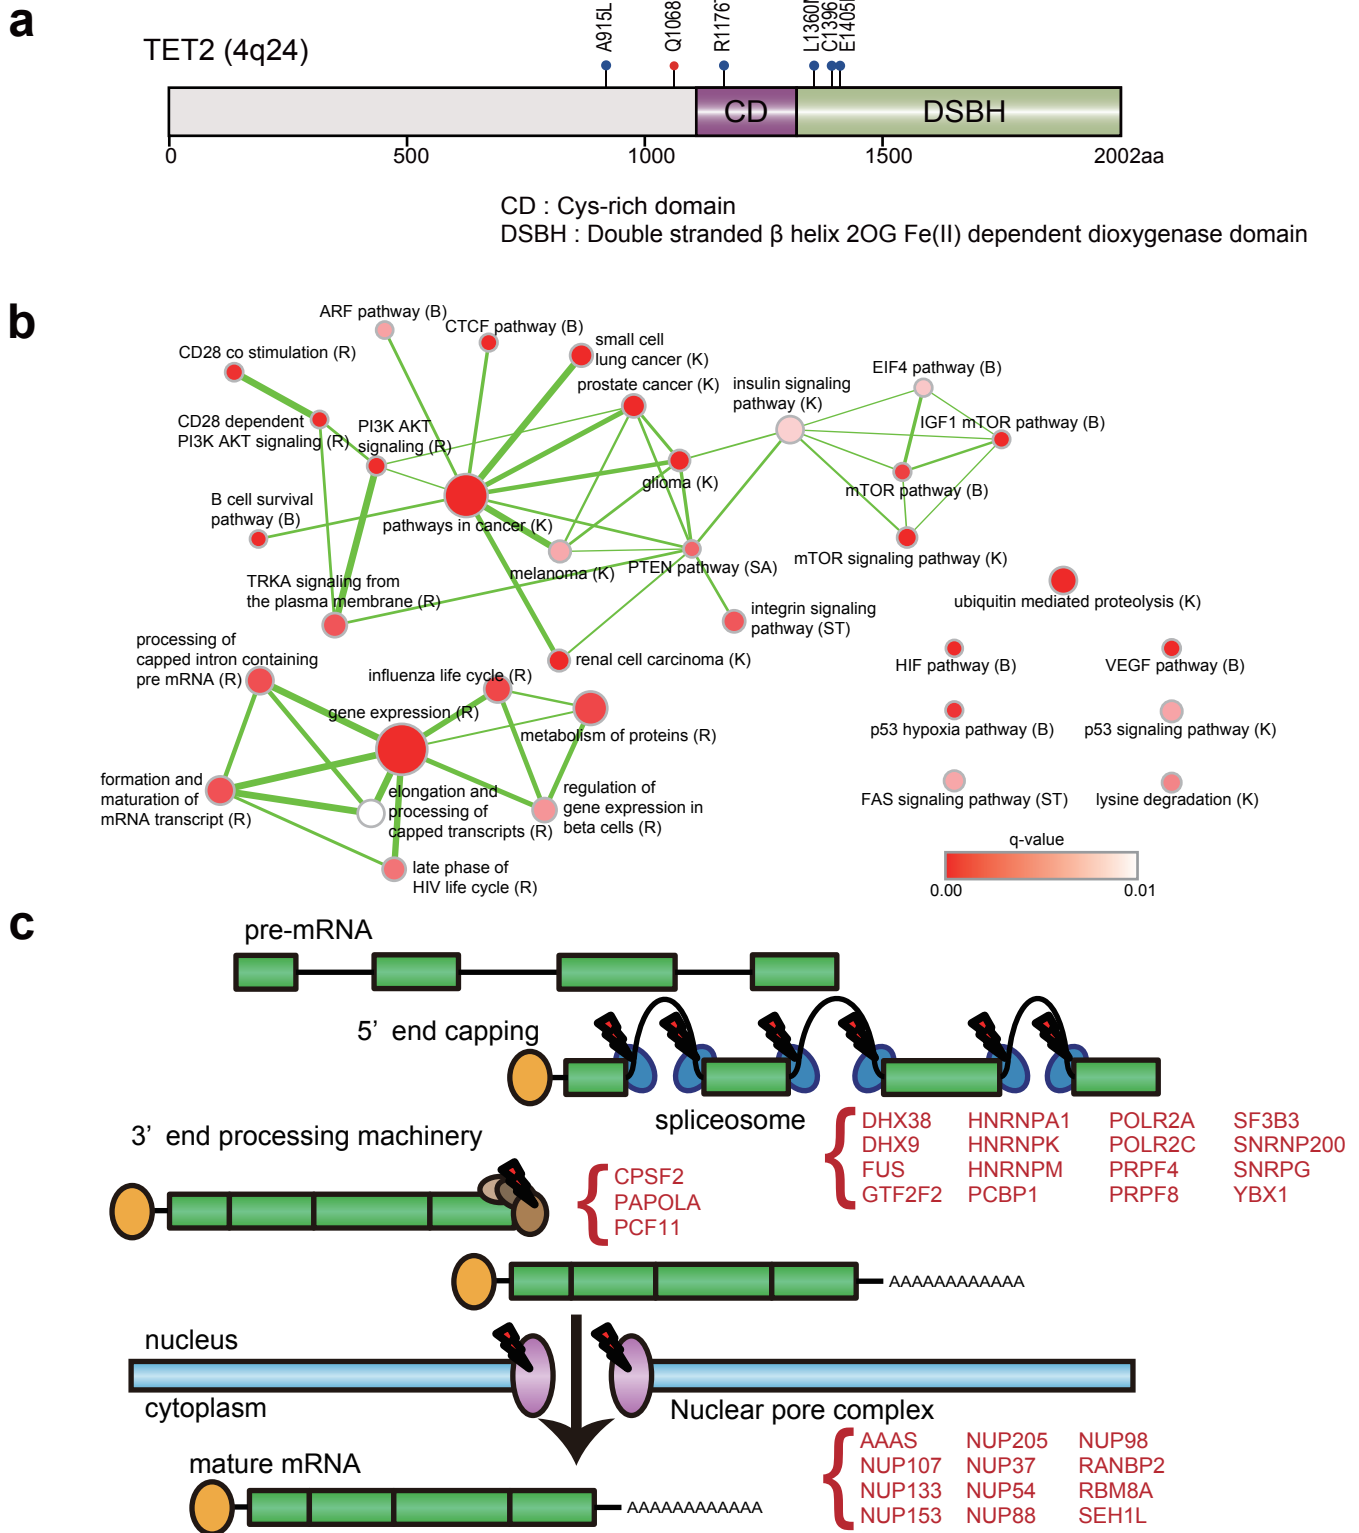

## Significantly mutated genes/pathways in 106 exome cases

(a) TET2 mutations in ccRCC. Type and position of TET2 mutations are indicated. (b) Significantly mutated pathways are shown in red circles based on the significance level ( $q$  values) as indicated by the color gradient. (B):BioCarta (K):KEGG (R):Reactome (ST):Signaling Transduction KE (c) Somatic mutations observed in the apparatus for mRNA processing.

## Supplementary Figure 14

### *KEAP1* mutation

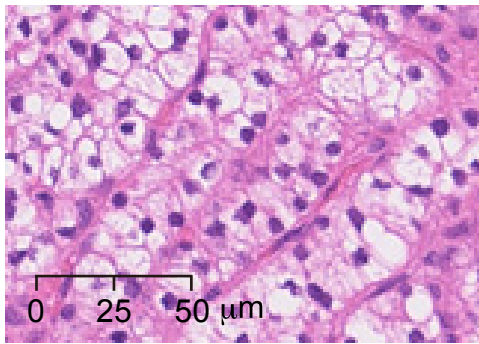

ccRCC-11

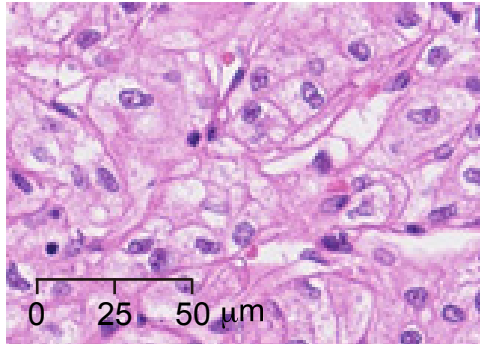

ccRCC-15

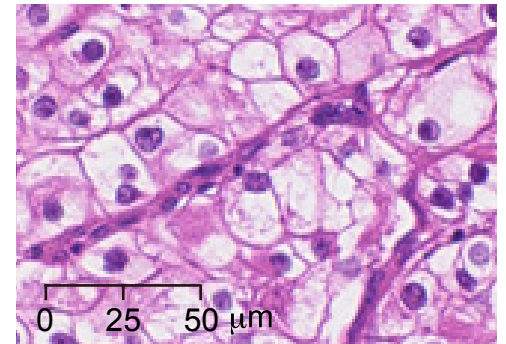

ccRCC-34

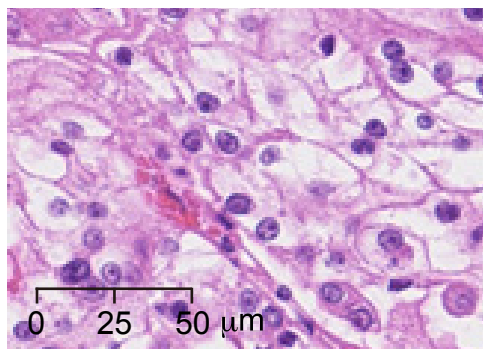

ccRCC-46

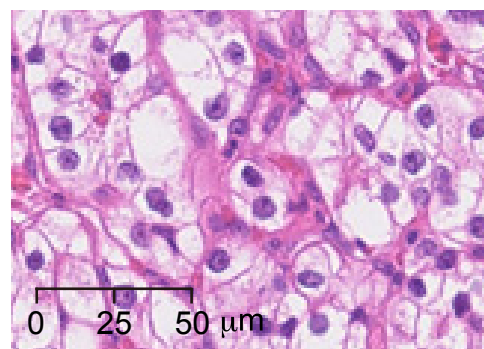

ccRCC-51

### *NRF2* mutation

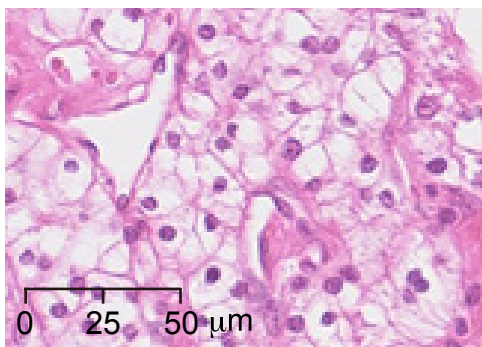

ccRCC-82

### *CUL3* mutation

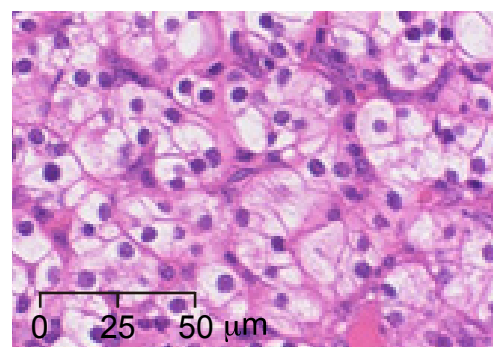

ccRCC-18

### Histologies of tumors having *KEAP1/NRF2/CUL3* mutations.

All cases were confirmed as clear cell RCC with no papillary components on HE staining.

# Supplementary Figure 15

Log<sub>2</sub> ratio  
-0.8 0 0.8 LOH with CN ≥ 2

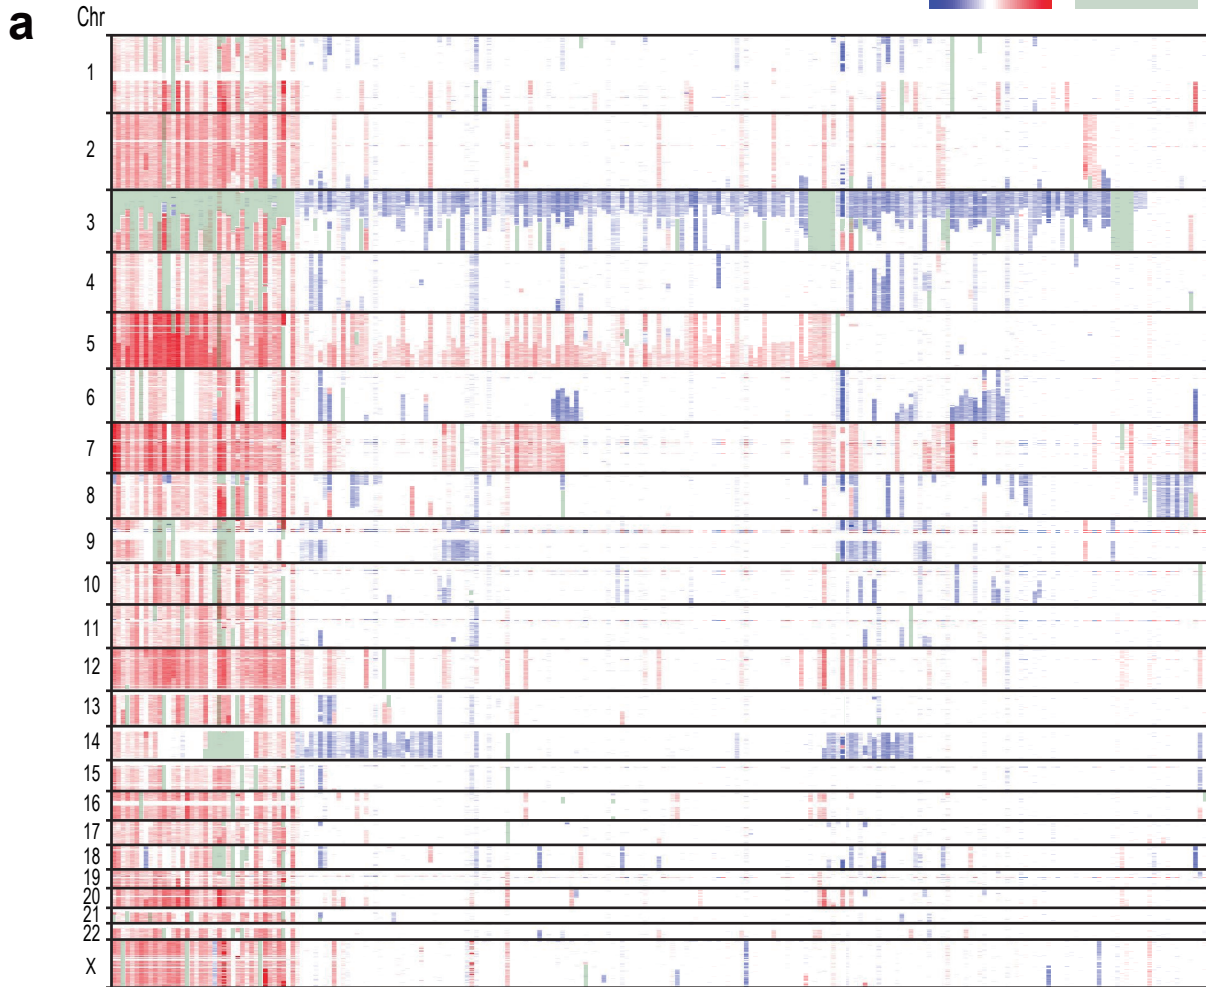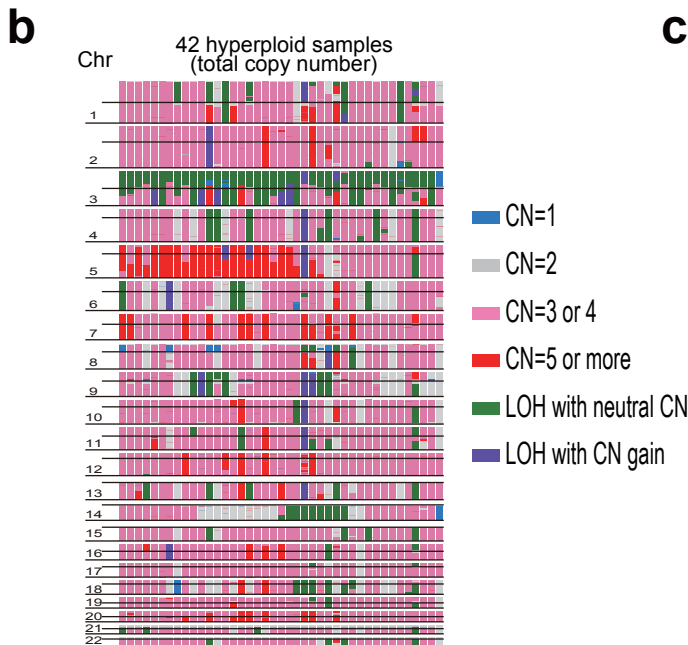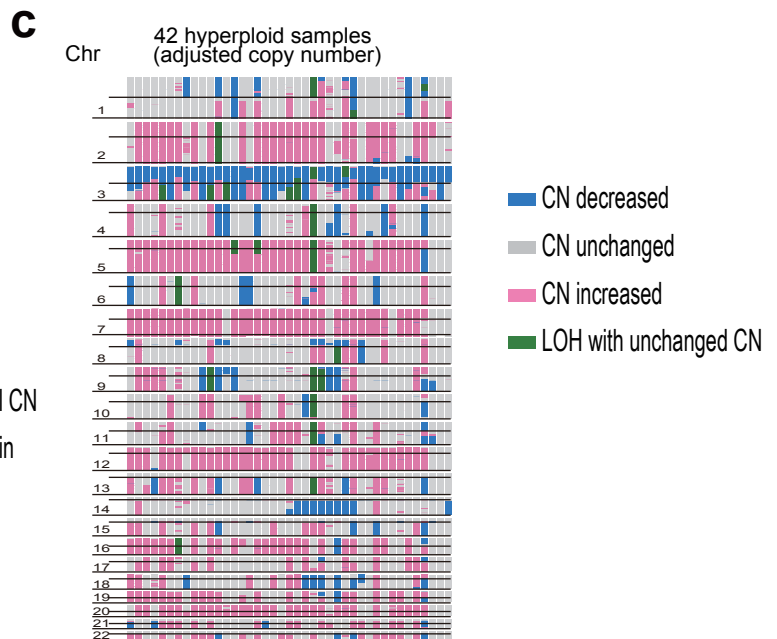

## Copy number profiles of 240 ccRCC specimens

(a) Genomic copy number determined by SNP array analysis are shown by a color gradient based on CNAG output for 240 ccRCC specimens. Regions showing copy neutral LOH are overlaid in light green. Samples were clustered based on major copy number lesions, including hyperploidy, 3p loss, 5q gain, 14q LOH, 9p LOH and other abnormalities. (b) Genomic copy numbers inferred by HMM based analysis of 42 hyperploid samples are shown by the indicated colors. (c) The copy number plots for hyperploid cases (b) were transformed by calculating relative copy numbers to the base line copy number (=3), in which the copy number status was either increased (CN > 3, pink), decreased (CN < 3, blue), or unchanged (CN = 3, gray). This relative copy number profile was an essentially identical to that for diploid samples (a), characterized by losses of 3p, 4q, 6q, 9p,9q, 14q and gains of 5q and 7q, suggesting that these hyperploid tumors were most likely progressed from diploid tumors as a relatively late event.

## Supplementary Figure 16

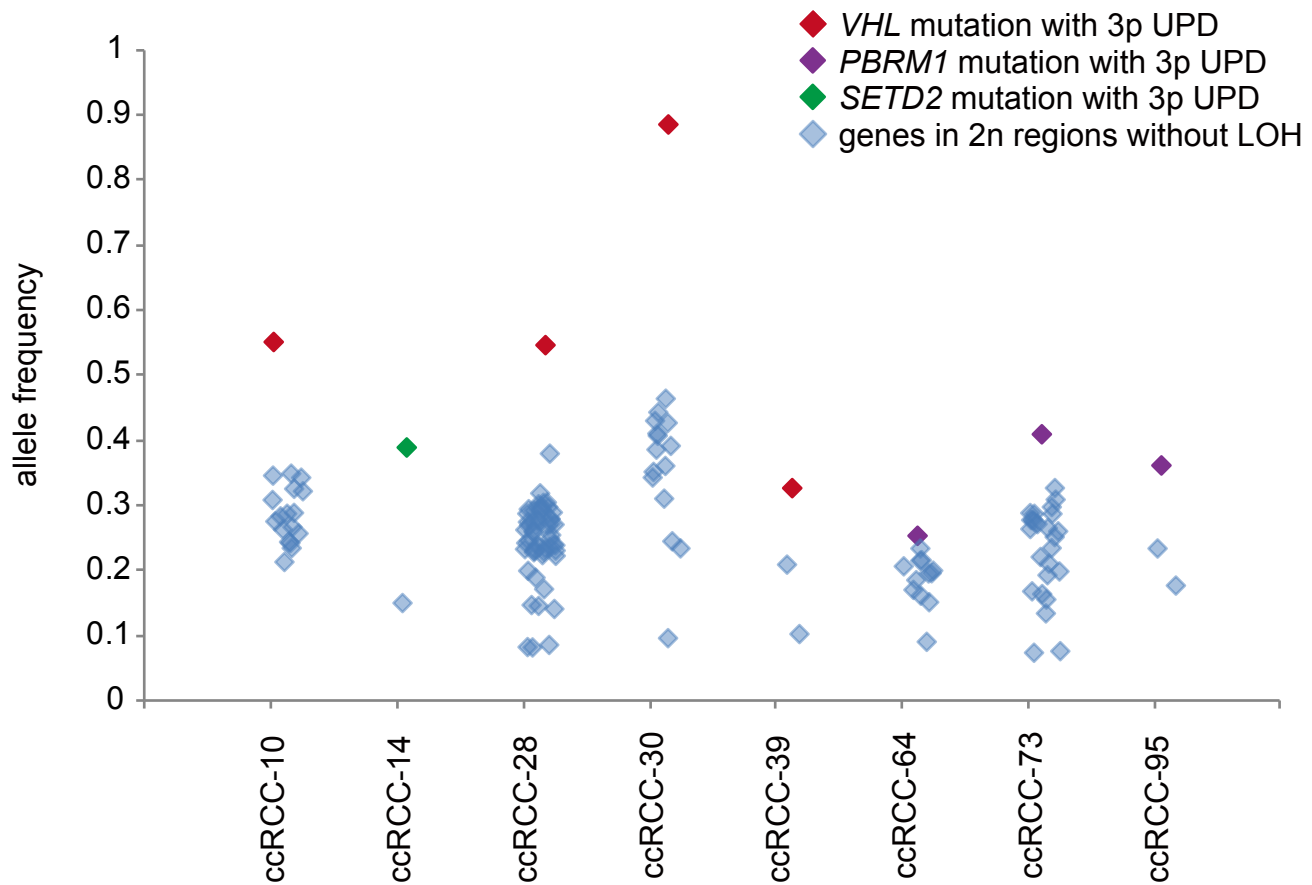

### Higher allele frequencies of mutations in the 3p target genes in cases with 3p UPD.

8 out of 25 cases with 3p UPD had mutations in either *VHL*, *PBRM1* or *SETD2*, which were analyzed by enough depths (> 50x) with whole exome sequencing for accurate estimation of allele frequency and also had one or more mutations in copy number 2n regions. Allele frequencies of 3p target in 3p UPD were higher than those of other mutations within 2n regions in all 3p UPD cases.



# Supplementary Figure 17

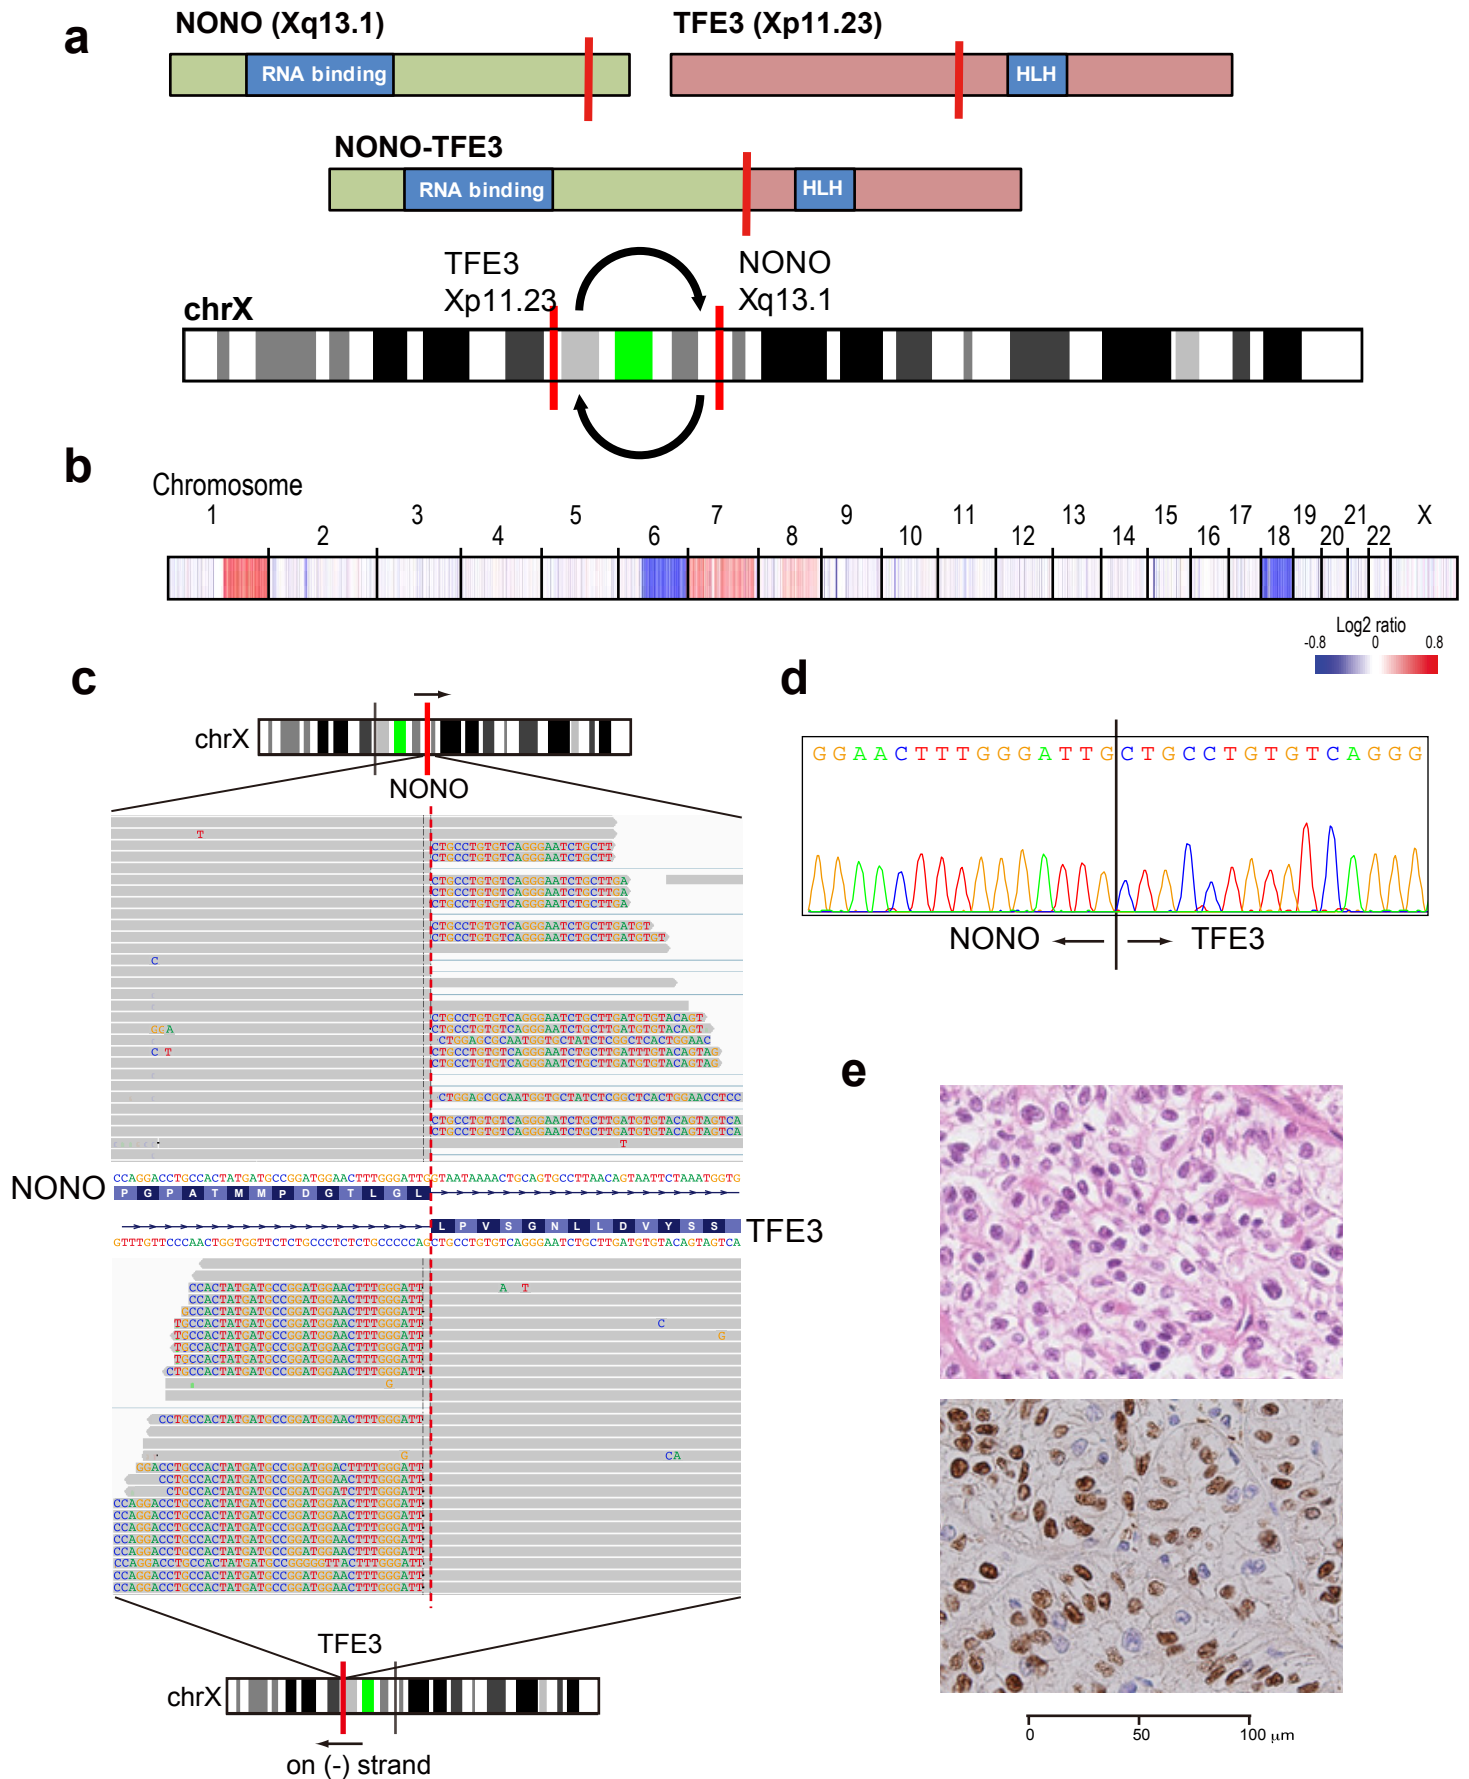

## ***NONO-TFE3* fusion transcript**

*NONO-TFE3* fusion transcript was found in single case (a), in which copy number alterations characteristic to ccRCC such as 3p LOH and 5q gain were lacked (b). The junction sequence of fusion transcript was shown with IGV viewer (c) and confirmed with sanger sequencing (d). (e) The tumor was positive for TFE3 in IHC (lower panel) but hardly distinguishable from other ccRCC cases on HE staining (upper panel).

# Supplementary Figure 18

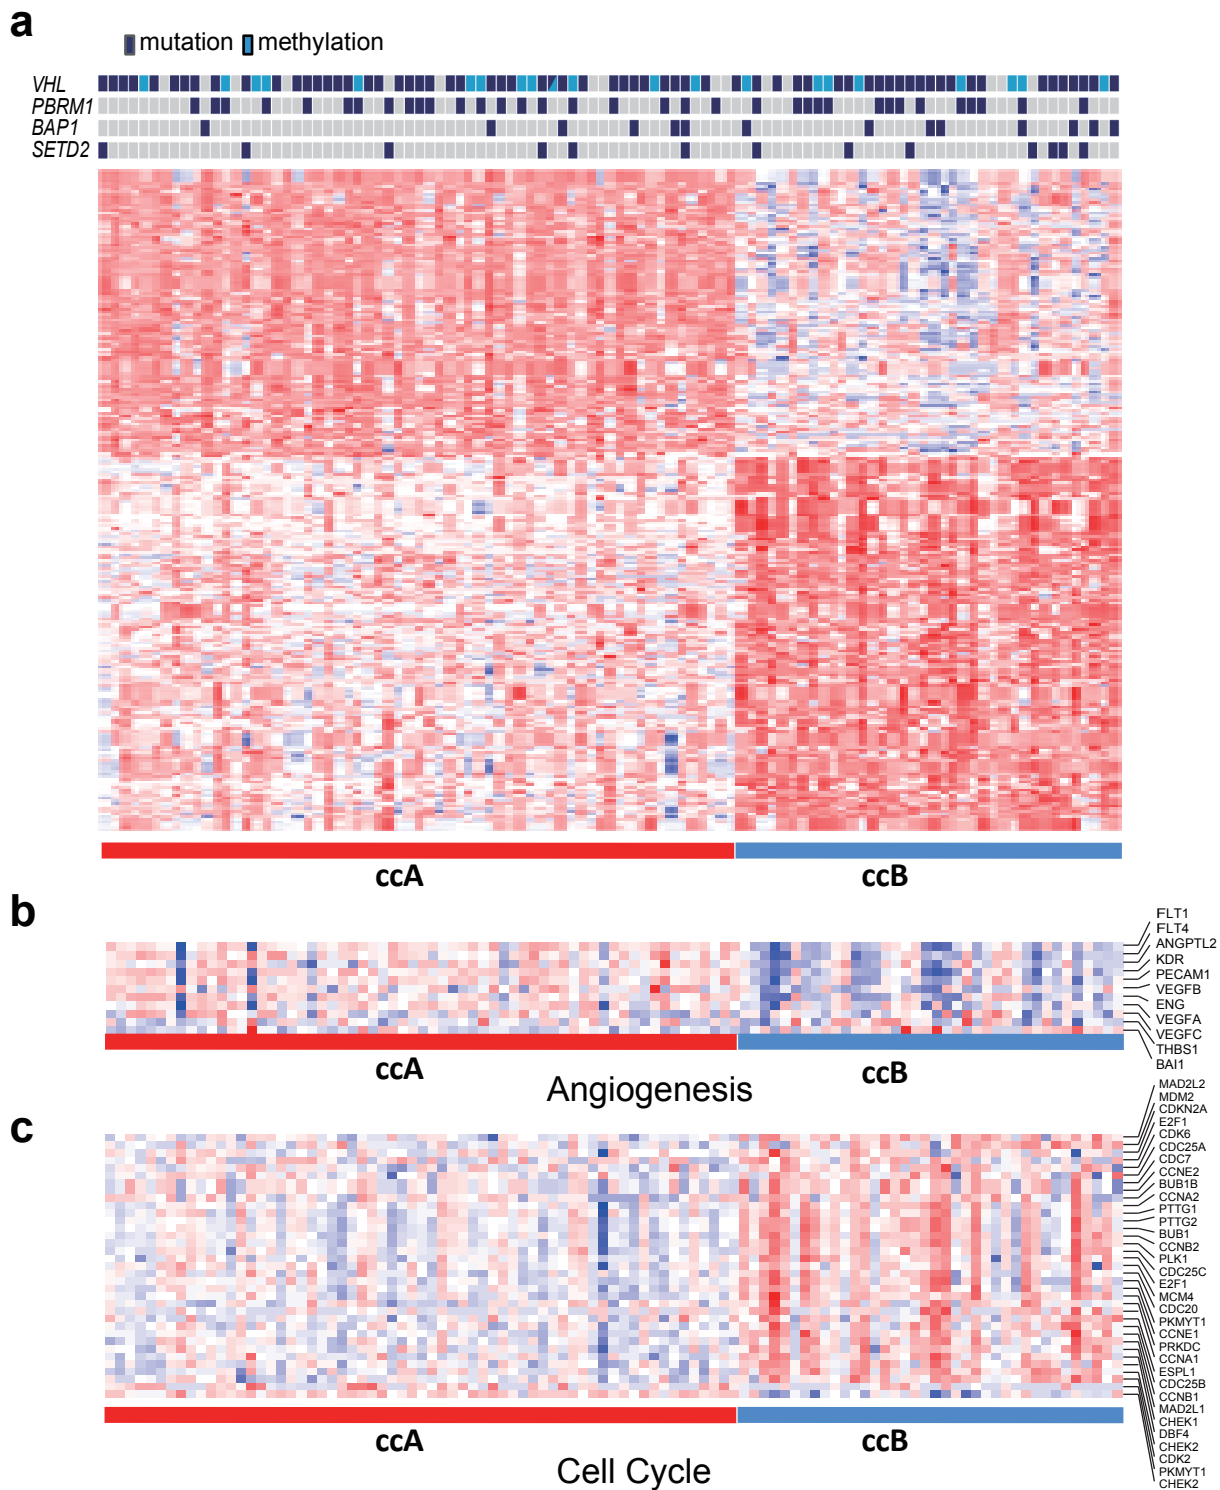

## ccA and ccB clusters identified from the expression profiles of 101 ccRCC samples

K-means clustering for 101 ccRCC specimens based on the expression of genes showing 2 major gene expression clusters: ccA and ccB (a). These were discriminated by the expression of genes involved in angiogenesis (b) and cell cycle progression (c). Mutation status of *VHL*, *PBRM1*, *BAP1* and *SETD2* is indicated in the top panels.

## Supplementary Figure 19

*BAP1* mutant vs *BAP1* WT

PRC2 targets

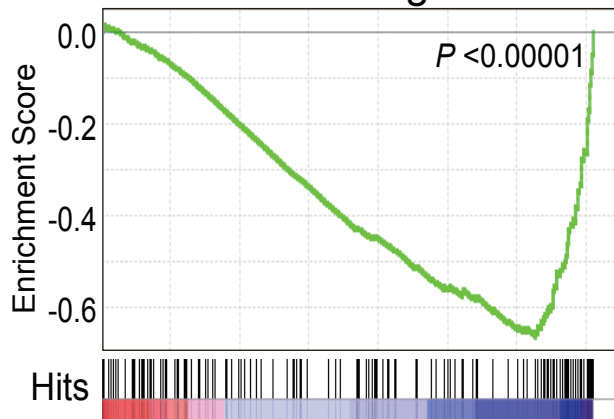

*PBRM1* mutant vs *PBRM1* WT

Hypoxia signature

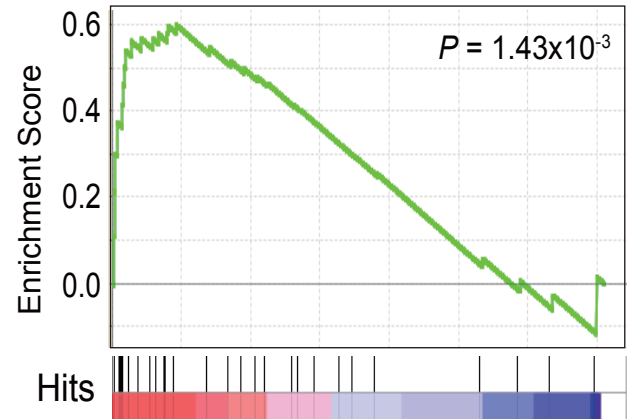

### Different expression signatures between *BAP1*- and *PBRM1*-mutated tumors.

Gene set enrichment analysis showed *BAP1*-mutated tumors showed significantly down-regulated expression of the PRC2 target genes, whereas *PBRM1*-mutated tumors were enriched for an up-regulated expression of gene set of hypoxia signature.

## Supplementary Figure 20

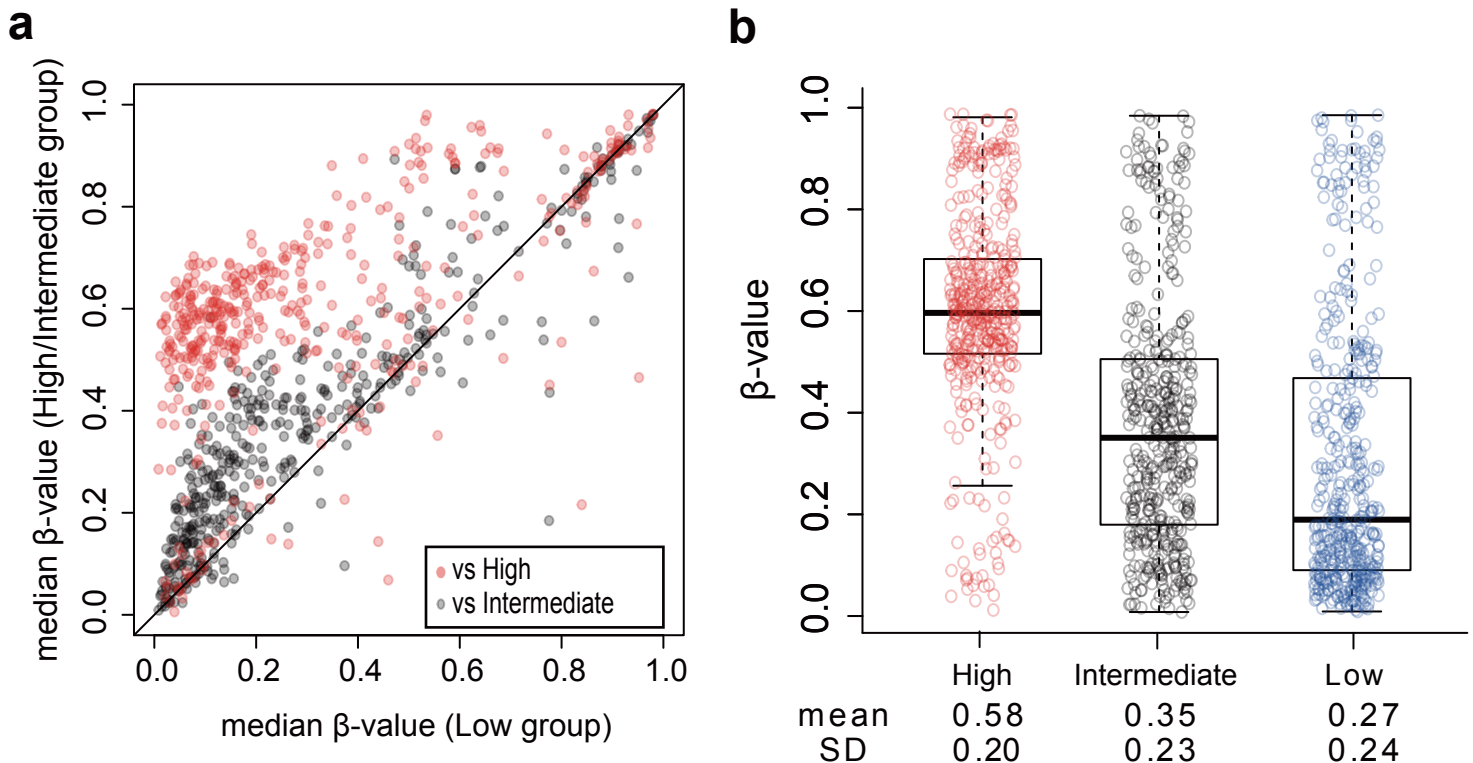

### Difference of methylation level among high/intimidate/low methylation clusters

(a) Median methylation levels ( $\beta$  values) are plotted for Low and High (red circles) and Low and Intermediate (black circles) methylation clusters for CpG island probes selected for unsupervised clustering analysis in Infinium 450K arrays. (b) Distribution of median methylation values ( $\beta$  values) are plotted within each methylation cluster (High, Intermediate and Low).

## Supplementary Figure 21

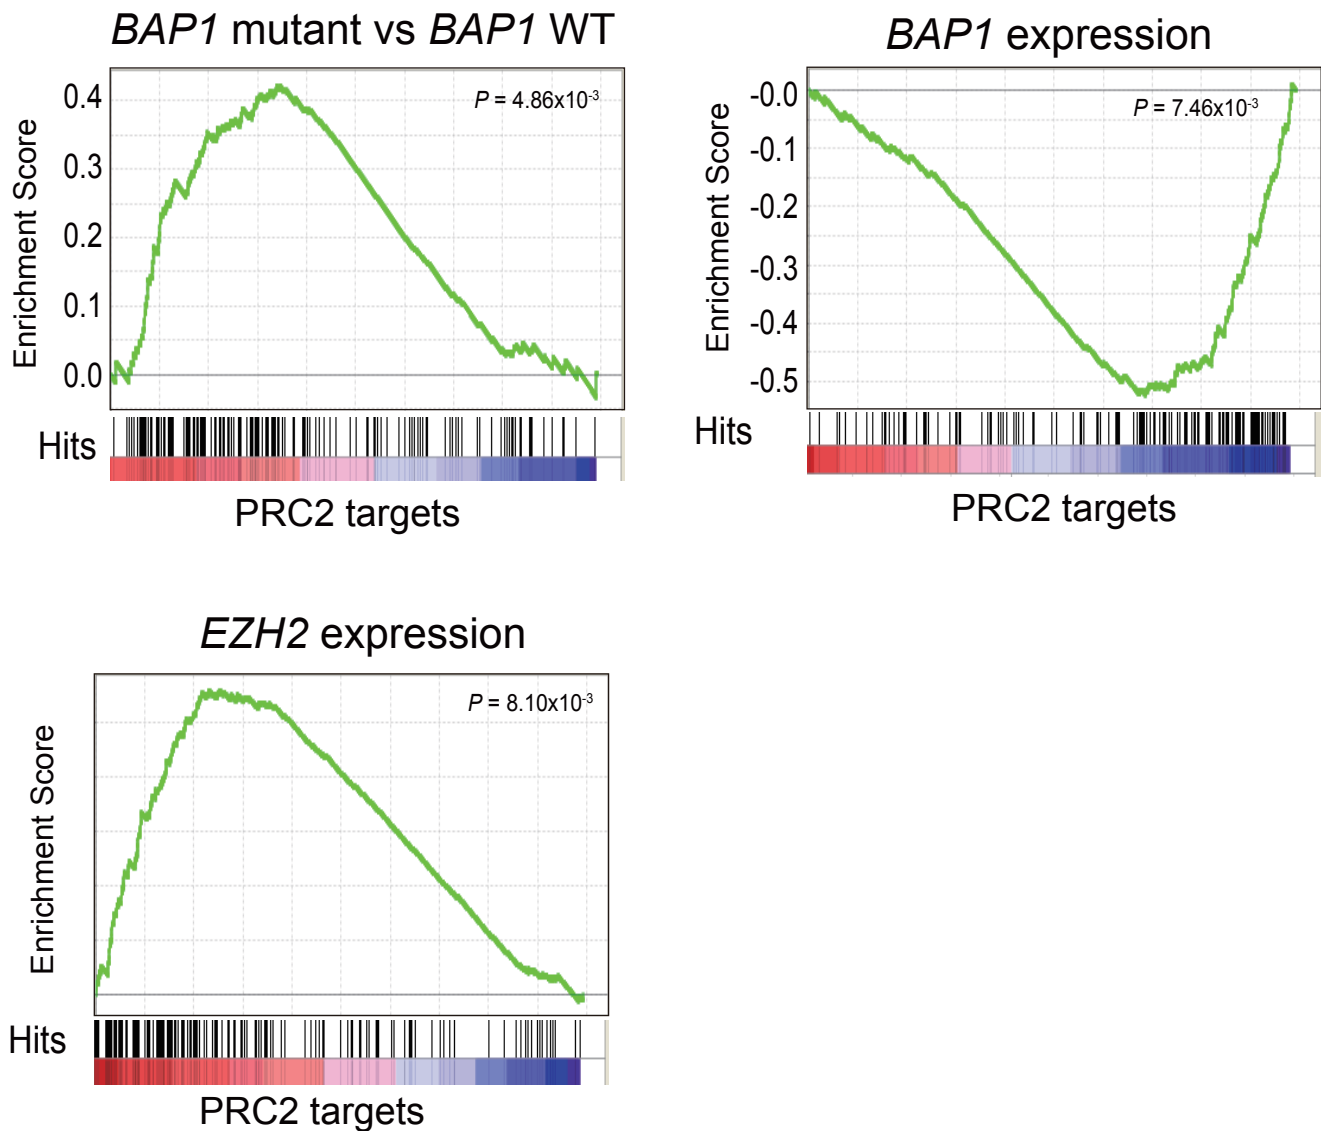

### Association between methylation of PRC2 target genes and *BAP1* mutation/expression and *EZH2* expression

Gene set enrichment analysis showed *BAP1* mutation, decreased *BAP1* expression and increased *EZH2* expression were significantly associated with increased methylation of PRC2 target genes.

## Supplementary Figure 22

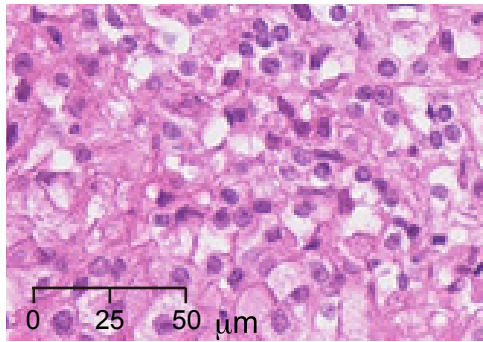

ccRCC-2

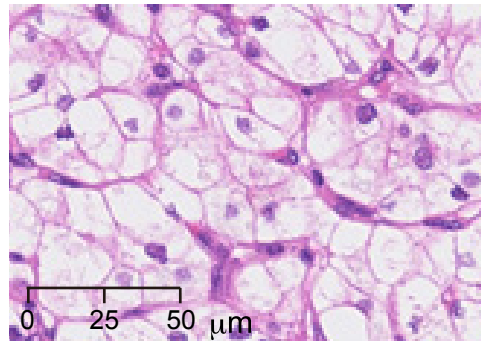

ccRCC-31

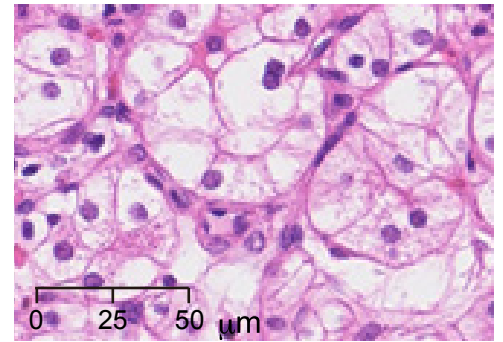

ccRCC-37

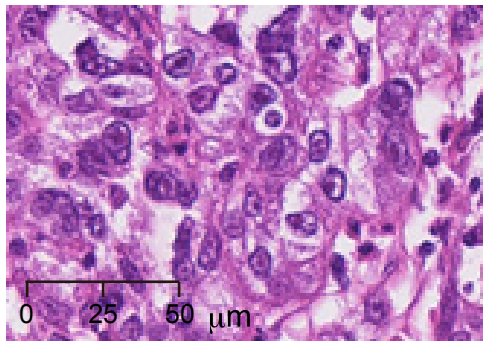

ccRCC-41

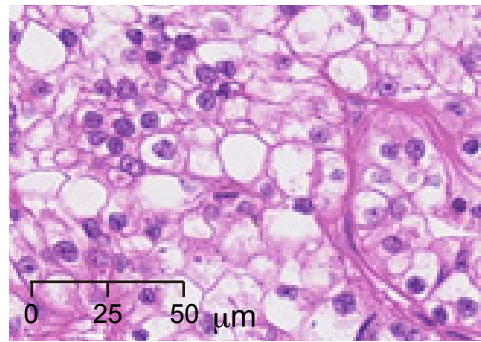

ccRCC-57

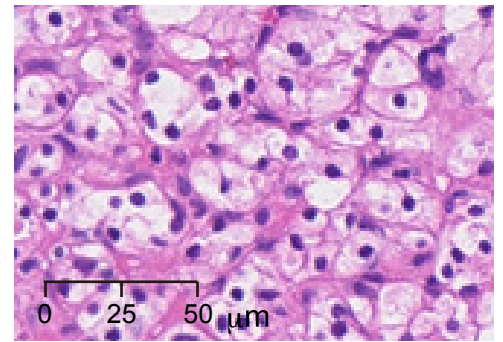

ccRCC-60

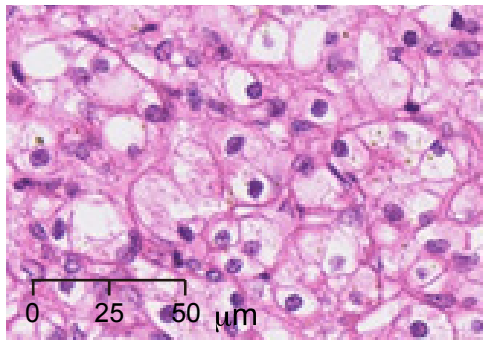

ccRCC-79

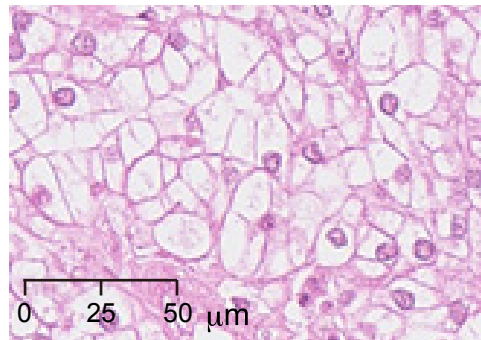

ccRCC-81

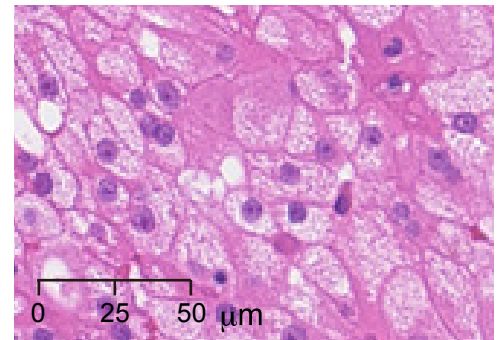

ccRCC-138

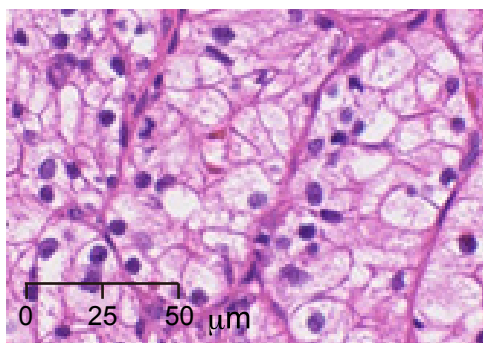

ccRCC-184

**Histologies of tumors having no *VHL* or *TCEB1* alterations.**  
All cases were confirmed as clear cell RCC on HE staining .

**Supplementary Table 5 Multivariate analysis of prognosis for 240 ccRCC cases**

| Factors      | No. of cases | Overall survival  |                | Desease free survival |                |
|--------------|--------------|-------------------|----------------|-----------------------|----------------|
|              |              | Relative risk     | <i>P</i> value | Relative risk         | <i>P</i> value |
| <i>PBRM1</i> |              |                   | 0.075          |                       | 0.115          |
| WT           | 142          |                   |                |                       |                |
| mut          | 98           | 1.82 (0.940-3.55) |                | 1.56 (0.896-2.73)     |                |
| <i>BAP1</i>  |              |                   | 0.020          |                       | 0.078          |
| WT           | 215          |                   |                |                       |                |
| mut          | 25           | 3.11 (1.22-6.97)  |                | 2.13 (0.912-4.41)     |                |
| <i>SETD2</i> |              |                   | 0.266          |                       | 0.001          |
| WT           | 214          |                   |                |                       |                |
| mut          | 26           | 1.69 (0.637-3.78) |                | 3.24 (1.66-5.93)      |                |

**Supplementary Table 6. Clinicopathological characteristics of *VHL* - and *TCEB1* -mutated tumors**

| Factors            | Categories | VHL-mut       | TCEB1-mut     | P value |
|--------------------|------------|---------------|---------------|---------|
| age                |            | 61.3 (27-91)  | 62.5 (42-77)  | 0.815   |
| sex                | M          | 168 (76.4%)   | 8 (100%)      | 0.218   |
|                    | F          | 52 (23.6%)    | 0             |         |
| tumor diameter     |            | 4.2 (3-6.125) | 3 (1.2-4.025) | 0.0680  |
| pT                 | 1a         | 116 (52.7%)   | 5 (62.5%)     | 0.744   |
|                    | 1b         | 55 (25.0%)    | 2 (25.0%)     |         |
|                    | 2          | 18 (8.2%)     | 0             |         |
|                    | 3          | 29 (13.2%)    | 1 (12.5%)     |         |
|                    | 4          | 2 (0.9%)      | 0             |         |
| N                  | 0          | 211 (95.9%)   | 8 (100%)      | 0.230   |
|                    | 1          | 5 (2.3%)      | 0             |         |
|                    | 2          | 4 (1.8%)      | 0             |         |
| M                  | 0          | 196 (89.1%)   | 8 (100%)      | 1.00    |
|                    | 1          | 24 (10.9%)    | 0             |         |
| metastasis duaring | +          | 170 (77.3%)   | 8 (100%)      | 0.377   |
|                    | -          | 50 (22.7%)    | 0             |         |
| Fuhrman grade      | 1          | 38 (17.4%)    | 2 (25.0%)     | 0.314   |
|                    | 2          | 130 (59.6%)   | 6 (75.0%)     |         |
|                    | 3          | 45 (20.6%)    | 0             |         |
|                    | 4          | 5 (2.3%)      | 0             |         |
| outcome            | alive      | 185 (84.1%)   | 8 (100%)      | 0.277   |
|                    | dead       | 35 (15.9%)    | 0             |         |

**Supplementary Table 7a. Knockdown efficacy of siRNA for TCEB1 mRNA**

| TCEB1 vector<br>siRNA                                                  | -     |      |      | mock  |      |      | WT    |      |      | Y79C  |      |      | A100P |      |      |
|------------------------------------------------------------------------|-------|------|------|-------|------|------|-------|------|------|-------|------|------|-------|------|------|
|                                                                        | TCEB1 | NC   | -    |
| endogenous <i>TCEB1</i>                                                | 0.028 | 0.79 | 0.87 | 0.021 | 0.91 | 0.93 | 0.033 | 0.89 | 1.10 | 0.028 | 1.02 | 0.99 | 0.026 | 0.97 | 0.82 |
| <i>GAPDH</i>                                                           | 0.99  | 0.92 | 0.95 | 1.09  | 1.01 | 1.14 | 0.85  | 0.92 | 1.28 | 1.20  | 1.03 | 1.09 | 1.02  | 1.05 | 0.91 |
| endogenous <i>TCEB1</i> / <i>GAPDH</i><br>ratio to nontreated-cell (%) | 0.028 | 0.86 | 0.91 | 0.019 | 0.90 | 0.82 | 0.039 | 0.96 | 0.86 | 0.024 | 0.99 | 0.91 | 0.026 | 0.93 | 0.91 |
|                                                                        | 3.10  | 94.7 | 100  | 2.12  | 98.5 | 90.0 | 4.27  | 105  | 93.7 | 2.60  | 108  | 99.4 | 2.81  | 102  | 99.1 |

- : not treated  
NC : negative control

**Supplementary Table 7b. List of siRNA used for knocking down of TCEB1**

|                                |                             |
|--------------------------------|-----------------------------|
| <i>TCEB1</i>                   | 5'-CUAUCGAAAGUAUGCAUGUTT-3' |
| Non-targeting negative control | 5'-UCUUAUUCGCGGUUAUAAGGC-3' |

**Supplementary Table 7c. List of primers used for quantitative RT PCR**

|                         | Forward primer         | Reverse primer         |
|-------------------------|------------------------|------------------------|
| endogenous <i>TCEB1</i> | GGCTGCGGGACTGACGAGAAAC | GACCTGGGCCACTCAACATGGC |
| <i>GAPDH</i>            | ACTGGCATGGCCTTCCGTGT   | ATGCCAGCCCCAGCGTCAA    |



**Supplementary Table 8. Results of immunostaining of HIF1 $\alpha$  and HIF2 $\alpha$**

| <b>sample ID</b> | <b>HIF1<math>\alpha</math></b> | <b>HIF2<math>\alpha</math></b> | <b>VHL</b>  | <b>TCEB1</b> |
|------------------|--------------------------------|--------------------------------|-------------|--------------|
| ccRCC-1          | 1+                             | 1+                             | mutation    | -            |
| ccRCC-2          | -                              | -                              | -           | -            |
| ccRCC-3          | 3+                             | 2+                             | mutation    | -            |
| ccRCC-4          | 2+                             | 2+                             | methylation | -            |
| ccRCC-5          | -                              | 1+                             | mutation    | -            |
| ccRCC-6          | 1+                             | 1+                             | mutation    | -            |
| ccRCC-7          | 2+                             | 3+                             | mutation    | -            |
| ccRCC-8          | 1+                             | 3+                             | methylation | -            |
| ccRCC-9          | 1+                             | -                              | mutation    | -            |
| ccRCC-10         | -                              | 1+                             | mutation    | -            |
| ccRCC-11         | 1+                             | 2+                             | mutation    | -            |
| ccRCC-12         | 1+                             | 1+                             | mutation    | -            |
| ccRCC-13         | 2+                             | 2+                             | mutation    | -            |
| ccRCC-14         | 1+                             | -                              | mutation    | -            |
| ccRCC-15         | 3+                             | -                              | mutation    | -            |
| ccRCC-16         | 1+                             | 2+                             | mutation    | -            |
| ccRCC-17         | 3+                             | 3+                             | methylation | -            |
| ccRCC-18         | 2+                             | 2+                             | mutation    | -            |
| ccRCC-19         | 3+                             | -                              | mutation    | -            |
| ccRCC-20         | 2+                             | -                              | mutation    | -            |
| ccRCC-21         | 2+                             | 1+                             | methylation | -            |
| ccRCC-22         | -                              | 1+                             | mutation    | -            |
| ccRCC-23         | 1+                             | 1+                             | methylation | -            |
| ccRCC-24         | 2+                             | -                              | mutation    | -            |
| ccRCC-25         | 1+                             | 1+                             | methylation | -            |
| ccRCC-26         | -                              | -                              | mutation    | -            |
| ccRCC-27         | 2+                             | 2+                             | -           | mutation     |
| ccRCC-28         | 1+                             | -                              | mutation    | -            |
| ccRCC-29         | 2+                             | 1+                             | mutation    | -            |
| ccRCC-30         | -                              | -                              | mutation    | -            |
| ccRCC-31         | 1+                             | -                              | -           | -            |
| ccRCC-32         | 2+                             | 2+                             | methylation | -            |
| ccRCC-33         | 2+                             | 1+                             | mutation    | -            |
| ccRCC-34         | 1+                             | 1+                             | mutation    | -            |
| ccRCC-35         | 2+                             | 2+                             | -           | mutation     |
| ccRCC-36         | 2+                             | 1+                             | mutation    | -            |
| ccRCC-37         | 3+                             | 2+                             | -           | -            |
| ccRCC-38         | 2+                             | 3+                             | methylation | -            |
| ccRCC-39         | -                              | -                              | mutation    | -            |
| ccRCC-40         | 1+                             | 1+                             | mutation    | -            |
| ccRCC-41         | -                              | 1+                             | -           | -            |
| ccRCC-42         | 3+                             | 1+                             | -           | mutation     |
| ccRCC-43         | 1+                             | -                              | methylation | -            |
| ccRCC-44         | 3+                             | 1+                             | methylation | -            |
| ccRCC-45         | -                              | 1+                             | methylation | -            |
| ccRCC-46         | -                              | 1+                             | mutation    | -            |
| ccRCC-47         | 2+                             | 1+                             | mutation    | -            |
| ccRCC-48         | 2+                             | -                              | -           | mutation     |
| ccRCC-49         | -                              | -                              | mutation    | -            |
| ccRCC-50         | 2+                             | 1+                             | mutation    | -            |
| ccRCC-51         | -                              | 1+                             | mutation    | -            |
| ccRCC-52         | 2+                             | 2+                             | mutation    | -            |
| ccRCC-53         | 2+                             | 3+                             | methylation | -            |
| ccRCC-54         | 1+                             | -                              | -           | mutation     |
| ccRCC-55         | 2+                             | 1+                             | mutation    | -            |
| ccRCC-56         | 2+                             | 1+                             | mutation    | -            |
| ccRCC-57         | 2+                             | -                              | -           | -            |
| ccRCC-58         | 1+                             | 1+                             | mutation    | -            |

|           |    |    |             |   |
|-----------|----|----|-------------|---|
| ccRCC-59  | 1+ | -  | mutation    | - |
| ccRCC-60  | 2+ | 2+ | -           | - |
| ccRCC-61  | 2+ | 2+ | mutation    | - |
| ccRCC-62  | 3+ | -  | mutation    | - |
| ccRCC-63  | 2+ | 1+ | mutation    | - |
| ccRCC-64  | -  | 1+ | mutation    | - |
| ccRCC-65  | -  | -  | mutation    | - |
| ccRCC-66  | 3+ | 2+ | mutation    | - |
| ccRCC-67  | 3+ | -  | mutation    | - |
| ccRCC-68  | 1+ | 1+ | mutation    | - |
| ccRCC-69  | 2+ | 1+ | mutation    | - |
| ccRCC-70  | 3+ | 1+ | methylation | - |
| ccRCC-71  | 3+ | -  | mutation    | - |
| ccRCC-72  | 2+ | 1+ | mutation    | - |
| ccRCC-73  | 3+ | 3+ | mutation    | - |
| ccRCC-74  | 2+ | 1+ | methylation | - |
| ccRCC-75  | 1+ | 1+ | mutation    | - |
| ccRCC-76  | 2+ | 1+ | methylation | - |
| ccRCC-77  | 3+ | 1+ | mutation    | - |
| ccRCC-78  | 1+ | -  | mutation    | - |
| ccRCC-79  | 2+ | 1+ | -           | - |
| ccRCC-80  | 2+ | 1+ | mutation    | - |
| ccRCC-81  | 1+ | -  | -           | - |
| ccRCC-82  | 3+ | 1+ | mutation    | - |
| ccRCC-83  | 1+ | -  | mutation    | - |
| ccRCC-84  | 1+ | 1+ | methylation | - |
| ccRCC-85  | 3+ | 1+ | mutation    | - |
| ccRCC-86  | 2+ | -  | methylation | - |
| ccRCC-87  | 2+ | 1+ | mutation    | - |
| ccRCC-88  | 3+ | 1+ | mutation    | - |
| ccRCC-89  | 2+ | -  | methylation | - |
| ccRCC-90  | 2+ | 1+ | methylation | - |
| ccRCC-91  | -  | 1+ | mutation    | - |
| ccRCC-92  | 2+ | 1+ | methylation | - |
| ccRCC-93  | 1+ | 1+ | mutation    | - |
| ccRCC-94  | -  | 1+ | mutation    | - |
| ccRCC-95  | 3+ | 2+ | mutation    | - |
| ccRCC-96  | 3+ | 1+ | methylation | - |
| ccRCC-97  | 1+ | 1+ | mutation    | - |
| ccRCC-98  | -  | -  | -           | - |
| ccRCC-99  | 2+ | 2+ | mutation    | - |
| ccRCC-100 | 1+ | 1+ | mutation    | - |
| ccRCC-101 | 1+ | -  | mutation    | - |
| ccRCC-102 | 3+ | 1+ | mutation    | - |
| ccRCC-103 | 3+ | 2+ | mutation    | - |
| ccRCC-104 | 1+ | 1+ | methylation | - |
| ccRCC-105 | 1+ | 1+ | mutation    | - |
| ccRCC-106 | 2+ | 1+ | mutation    | - |

**SupplementaryTable 9. Significantly enriched mutational pathways**

| Gene set                                            | Number of bases<br>in gene set | Number of mutation | P value   | q value   |
|-----------------------------------------------------|--------------------------------|--------------------|-----------|-----------|
| pathways in cancer (K)                              | 647781                         | 131                | < 1E-16   | < 1E-16   |
| VEGF pathway (B)                                    | 52089                          | 48                 | 8.79.E-17 | 3.87.E-14 |
| HIF pathway (B)                                     | 25881                          | 43                 | 1.28.E-16 | 3.76.E-14 |
| renal cell carcinoma (K)                            | 117204                         | 65                 | 1.33.E-16 | 2.93.E-14 |
| ubiquitin mediated proteolysis (K)                  | 280992                         | 73                 | 4.85.E-15 | 8.53.E-13 |
| CTCF pathway (B)                                    | 38646                          | 20                 | 8.61.E-10 | 1.26.E-07 |
| prostate cancer (K)                                 | 161541                         | 40                 | 2.23.E-08 | 2.81.E-06 |
| IGF1mTOR pathway (B)                                | 36615                          | 17                 | 7.05.E-08 | 7.75.E-06 |
| glioma (K)                                          | 114846                         | 31                 | 1.30.E-07 | 1.28.E-05 |
| small cell lung cancer (K)                          | 208560                         | 44                 | 3.74.E-07 | 3.29.E-05 |
| mTOR signaling pathway (K)                          | 96279                          | 27                 | 3.94.E-07 | 3.15.E-05 |
| CD28 dependent PI3K AKT signaling (R)               | 36003                          | 15                 | 1.51.E-06 | 1.11.E-04 |
| PI3K AKT signalling (R)                             | 74460                          | 22                 | 1.96.E-06 | 1.33.E-04 |
| gene expression (R)                                 | 671376                         | 99                 | 2.22.E-06 | 1.39.E-04 |
| bcellsurvival pathway (B)                           | 33207                          | 14                 | 2.91.E-06 | 1.71.E-04 |
| CD28 co stimulation (R)                             | 49233                          | 16                 | 1.50.E-05 | 8.24.E-04 |
| p53hypoxia pathway (B)                              | 50592                          | 16                 | 2.07.E-05 | 1.07.E-03 |
| mTOR pathway (B)                                    | 52908                          | 16                 | 3.50.E-05 | 1.71.E-03 |
| metabolism of proteins (R)                          | 245715                         | 43                 | 4.31.E-05 | 2.00.E-03 |
| influenza life cycle (R)                            | 176829                         | 34                 | 4.49.E-05 | 1.98.E-03 |
| formation and maturation of mRNA transcript (R)     | 225633                         | 40                 | 5.93.E-05 | 2.48.E-03 |
| processing of capped intron containing pre mRNA (R) | 249408                         | 43                 | 5.97.E-05 | 2.39.E-03 |
| TRKA signalling from the plasma membrane (R)        | 211965                         | 38                 | 7.11.E-05 | 2.72.E-03 |
| integrin signaling pathway (ST)                     | 181737                         | 34                 | 7.52.E-05 | 2.76.E-03 |
| PTEN pathway (SA)                                   | 29622                          | 11                 | 9.87.E-05 | 3.48.E-03 |
| late phase of HIV life cycle (R)                    | 178863                         | 33                 | 1.22.E-04 | 4.12.E-03 |
| lysine degradation (K)                              | 106773                         | 23                 | 1.48.E-04 | 4.82.E-03 |
| regulation of gene expression in beta cells (R)     | 67380                          | 17                 | 1.76.E-04 | 5.53.E-03 |
| ARF pathway (B)                                     | 32121                          | 11                 | 1.97.E-04 | 5.98.E-03 |
| FAS signaling pathway (ST)                          | 116727                         | 24                 | 2.12.E-04 | 6.21.E-03 |
| p53 signaling pathway (K)                           | 102570                         | 22                 | 2.15.E-04 | 6.11.E-03 |
| melanoma (K)                                        | 96036                          | 21                 | 2.30.E-04 | 6.32.E-03 |
| EIF4 pathway (B)                                    | 50982                          | 14                 | 2.76.E-04 | 7.36.E-03 |
| insulin signaling pathway (K)                       | 260913                         | 42                 | 2.95.E-04 | 7.64.E-03 |
| elongation and processing of capped transcripts (R) | 198138                         | 34                 | 3.55.E-04 | 8.91.E-03 |

(B) : Biocarta (K) : KEGG (R) : Reactome (SA) : SigmaAldrich (ST) : Signaling Transduction KE

**Supplementary Table 15. List of antibodies for immunoblot analysis**

|                                          | <b>Target</b>   | <b>Host</b> | <b>Company</b>                | <b>Catalog Number</b> | <b>Dilution</b> |
|------------------------------------------|-----------------|-------------|-------------------------------|-----------------------|-----------------|
| <b>Primary antibody</b>                  | Elongin C       | Mouse       | BD Bioscience                 | 610761                | 1:1000          |
|                                          | Elongin B       | Rabbit      | previously described          |                       | 1:500           |
|                                          | HIF-1a          | Mouse       | BD Bioscience                 | 610958                | 1:1000          |
|                                          | CUL2            | Rabbit      | Invitrogen                    | 511800                | 1:500           |
|                                          | VHL             | Mouse       | BD Bioscience                 | 556347                | 1:500           |
|                                          | Actin           | Goat        | Santa Cruz Biotechnology      | sc-1616               | 1:4000          |
|                                          | HA              | Rabbit      | Covance                       | PRB-101C              | 1:4000          |
|                                          | HA              | Mouse       | Covance                       | MMS-101P              | 1:4000          |
|                                          | Flag            | Rabbit      | Sigma-Aldrich                 | F425                  | 1:4000          |
|                                          | Flag            | Mouse       | Wako Pure Chemical Industries | 018-22381             | 1:4000          |
| <b>Secondary HRP-conjugated antibody</b> | Anti-mouse IgG  | Sheep       | GE Healthcare Life Science    | NA931                 | 1:8000          |
|                                          | Anti-rabbit IgG | Donkey      | GE Healthcare Life Science    | NA934                 | 1:8000          |
|                                          | Anti-goat IgG   | Goat        | Santa Cruz Biotechnology      | sc-2033               | 1:8000          |

**Supplementary Note.**

Tumor samples with matched normal tissue or blood were obtained at the time of surgery from the University of Tokyo. All patients provided informed consent as a part of the ethics committee of the Graduate School of Medicine, the University of Tokyo. Collected phenotypic data elements were deidentified.
