# Supplementary material for: Integrated molecular analysis of clear-cell renal cell carcinoma
Source: Springer Nature journal article supplement (doi:10.1038/ng.2699), 2013-06-24
Supplement: 41588_2013_BFng2699_MOESM39_ESM.xlsx [file 41588_2013_BFng2699_MOESM39_ESM.xlsx]

## Sheet: summary_all
Supplementary table 10. Summary of RNA sequencing data
Sample Name	Total Reads	Mapped Reads	Reads Mapped on RefSeq Gene	Reads Mapped on Exon
ccRCC-1	171245466	169142112	146892620	128129146
ccRCC-2	99666912	98980963	59181030	55648622
ccRCC-3	179047548	176424181	150913251	135092194
ccRCC-4	138142858	92568943	82052291	73496540
ccRCC-5	180493390	178689341	156170486	138847831
ccRCC-6	119512824	118726962	100881213	93136461
ccRCC-7	120922760	120108856	104304277	96826518
ccRCC-8	94850152	94132985	76957195	66651904
ccRCC-9	221106600	99324103	85895273	75656706
ccRCC-10	200266196	129302134	119691115	109686526
ccRCC-11	82689542	82125396	71860885	67019227
ccRCC-12	105677664	104915914	86996345	79727467
ccRCC-13	162351208	158850287	143400881	133065839
ccRCC-14	154720142	153387623	126753142	119723424
ccRCC-15	68330550	67838697	60424279	57140825
ccRCC-16	60984200	60682726	53920703	49396998
ccRCC-17	84445586	83684119	72425994	66234363
ccRCC-18	125727190	122376996	109038845	97526392
ccRCC-19	113933642	112279752	99584170	87671975
ccRCC-20	77724318	77088592	68107958	63340002
ccRCC-21	156369320	155210553	131682162	120767426
ccRCC-22	148165854	92784945	80213679	73300760
ccRCC-23	170034690	168404819	144889242	133582374
ccRCC-24	127458140	126569833	113892608	103457034
ccRCC-25	74582520	61529728	55052725	50975822
ccRCC-26	62055886	61228423	47430683	43103067
ccRCC-27	88825198	88370786	77500320	71841679
ccRCC-28	83765694	83331636	70423648	64354099
ccRCC-29	67924152	67173304	59773272	55678289
ccRCC-30	114587482	113647227	106760342	98729962
ccRCC-31	173865426	131709975	121182744	108355917
ccRCC-32	75225990	74472376	61831246	55778247
ccRCC-34	156894328	155602234	123883475	110773635
ccRCC-35	81096860	80457374	71043189	64543592
ccRCC-36	180275772	178342117	120640697	106419572
ccRCC-37	43204800	42713554	25362157	22735868
ccRCC-38	110059986	109337787	94280786	87909022
ccRCC-39	60686636	60119514	45028933	41469527
ccRCC-40	144599994	143380216	117566536	107469806
ccRCC-41	119685284	119062577	106055683	100747647
ccRCC-42	161516450	160276846	137992887	128534006
ccRCC-43	211455688	209731711	151658614	134045698
ccRCC-44	104827980	103829017	93796117	85466598
ccRCC-45	133637588	131218369	106276885	90242579
ccRCC-46	149193412	148029310	131480801	122636305
ccRCC-48	113593658	112730798	101071596	94133474
ccRCC-49	133008312	131428843	103443792	94914956
ccRCC-50	104230912	102748136	97046555	90212521
ccRCC-51	163956460	161495493	142071713	136570070
ccRCC-52	175706736	174445894	155281558	143999445
ccRCC-53	121377404	81277934	71646379	65068706
ccRCC-54	187817016	141014512	129976201	117842108
ccRCC-55	153037742	151023299	138788303	127429600
ccRCC-56	42090919	41342843	30270855	27327683
ccRCC-58	137281224	135179325	118831895	108025519
ccRCC-59	194596886	142626591	128934005	118403027
ccRCC-60	127686012	96381657	87604959	80736870
ccRCC-61	120320708	119173939	95184638	85275447
ccRCC-62	156050324	127226689	118063332	104135636
ccRCC-64	117327454	116270171	94904681	87529657
ccRCC-65	139440048	104229729	94863091	85895580
ccRCC-66	109355986	108616924	96860347	90789580
ccRCC-67	154539884	153338251	130488857	120806389
ccRCC-68	129965846	129004634	107637809	96474386
ccRCC-69	106900004	106112555	85791220	78492665
ccRCC-70	96935160	96122514	86174334	81095994
ccRCC-71	108661022	107888481	97154560	89954572
ccRCC-72	196950062	195371617	172786315	160407510
ccRCC-73	149655210	148719672	127640761	117441330
ccRCC-75	148163112	146758897	120228671	104323872
ccRCC-76	165340222	163911721	136545993	124711796
ccRCC-77	106210700	105488642	92319431	84939113
ccRCC-78	101457328	100789803	79012428	72520860
ccRCC-79	79772882	79269969	69610222	63622446
ccRCC-80	117533818	116843193	103729686	98433863
ccRCC-81	230310846	156389655	143014492	127833849
ccRCC-82	112294768	111301333	93229501	83360409
ccRCC-83	123424484	122277688	104502420	94289455
ccRCC-84	75993634	75456789	66863693	61800766
ccRCC-85	187749742	184243819	161378252	145184575
ccRCC-86	141587818	140561690	126230899	116974922
ccRCC-87	169809428	168464761	153093797	139561451
ccRCC-88	166871310	165547202	136779897	125554504
ccRCC-89	130371538	129378434	112885516	103766936
ccRCC-90	99302044	98501828	87634817	82506037
ccRCC-91	127225246	126410008	106019376	96613980
ccRCC-92	136819028	134279636	118457703	107893698
ccRCC-93	135920282	135049029	120239742	112479784
ccRCC-94	121211084	120126625	101479845	92023364
ccRCC-95	126311830	125508801	115151684	107895449
ccRCC-96	147307504	112830720	103859320	95652293
ccRCC-97	138734276	137591564	122946958	111970270
ccRCC-98	140710328	139567422	121589669	113512915
ccRCC-99	104984328	104258028	93001235	86058363
ccRCC-100	154911058	152163692	132832029	119831360
ccRCC-102	118359490	115938254	96504572	86549017
ccRCC-103	117632442	116720051	102502368	94599748
ccRCC-104	136316024	135469705	120608900	111600550
ccRCC-105	136493720	135516206	116420310	108213784
ccRCC-106	175345718	174041947	146398821	133191519
